RESEARCH ARTICLE

# *Pseudomonas aeruginosa* type IV minor pilins and PilY1 regulate virulence by modulating FimS-AlgR activity

Victoria A. Marko, Sara L. N. Kilmury, Lesley T. MacNeil, Lori L. Burrows\*

Department of Biochemistry and Biomedical Sciences and the Michael G. DeGroot Institute for Infectious Diseases Research, McMaster University, Hamilton, ON, Canada

\* [burrowl@mcmaster.ca](mailto:burrowl@mcmaster.ca)

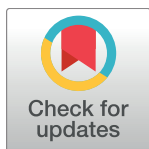

 OPEN ACCESS

**Citation:** Marko VA, Kilmury SLN, MacNeil LT, Burrows LL (2018) *Pseudomonas aeruginosa* type IV minor pilins and PilY1 regulate virulence by modulating FimS-AlgR activity. PLoS Pathog 14(5): e1007074. <https://doi.org/10.1371/journal.ppat.1007074>

**Editor:** Vincent T. Lee, University of Maryland, UNITED STATES

**Received:** April 2, 2018

**Accepted:** May 4, 2018

**Published:** May 18, 2018

**Copyright:** © 2018 Marko et al. This is an open access article distributed under the terms of the [Creative Commons Attribution License](https://creativecommons.org/licenses/by/4.0/), which permits unrestricted use, distribution, and reproduction in any medium, provided the original author and source are credited.

**Data Availability Statement:** All relevant data are within the paper and its Supporting Information files.

**Funding:** This work was funded by an operating grant from the Canadian Institutes of Health Research #MOP 86639 to LLB. VAM held a Canada Graduate Scholarship from CIHR. SLNK held an Ontario Graduate Scholarship from the Government of Ontario. The funders had no role in study design, data collection and analysis, decision to publish, or preparation of the manuscript.

## Abstract

Type IV pili are expressed by a wide range of prokaryotes, including the opportunistic pathogen *Pseudomonas aeruginosa*. These flexible fibres mediate twitching motility, biofilm maturation, surface adhesion, and virulence. The pilus is composed mainly of major pilin subunits while the low abundance minor pilins FimU-PilVWXE and the putative adhesin PilY1 prime pilus assembly and are proposed to form the pilus tip. The minor pilins and PilY1 are encoded in an operon that is positively regulated by the FimS-AlgR two-component system. Independent of pilus assembly, PilY1 was proposed to be a mechanosensory component that—in conjunction with minor pilins—triggers up-regulation of acute virulence phenotypes upon surface attachment. Here, we investigated the link between the minor pilins/PilY1 and virulence. *pilW*, *pilX*, and *pilY1* mutants had reduced virulence towards *Caenorhabditis elegans* relative to wild type or a major pilin mutant, implying a role in pathogenicity that is independent of pilus assembly. We hypothesized that loss of specific minor pilins relieves feedback inhibition on FimS-AlgR, increasing transcription of the AlgR regulon and delaying *C. elegans* killing. Reporter assays confirmed that FimS-AlgR were required for increased expression of the minor pilin operon upon loss of select minor pilins. Overexpression of AlgR or its hyperactivation via a phosphomimetic mutation reduced virulence, and the virulence defects of *pilW*, *pilX*, and *pilY1* mutants required FimS-AlgR expression and activation. We propose that PilY1 and the minor pilins inhibit their own expression, and that loss of these proteins leads to FimS-mediated activation of AlgR that suppresses expression of acute-phase virulence factors and delays killing. This mechanism could contribute to adaptation of *P. aeruginosa* in chronic lung infections, as mutations in the minor pilin operon result in the loss of piliation and increased expression of AlgR-dependent virulence factors—such as alginate—that are characteristic of such infections.

## Author summary

*Pseudomonas aeruginosa* causes dangerous infections, including chronic lung infections in cystic fibrosis patients. It uses many strategies to infect its hosts, including deployment

**Competing interests:** The authors have declared that no competing interests exist.

of grappling hook-like fibres called type IV pili. Among the components involved in assembly and function of the pilus are five proteins called minor pilins that—along with a larger protein called PilY1—may help the pilus attach to surfaces. In a roundworm infection model, loss of PilY1 and specific minor pilins delayed killing, while loss of other pilus components did not. We traced this effect to increased activation of the FimS-AlgR regulatory system that inhibits the expression of virulence factors used early in infection, while positively regulating chronic infection traits such as alginate production, a phenotype called mucoidy. A disruption in the appropriate timing of FimS-AlgR-dependent virulence factor expression when select minor pilins or PilY1 are missing may explain why those pilus-deficient mutants have reduced virulence compared with others whose products are not under FimS-AlgR control. Increased FimS-AlgR activity upon loss of PilY1 and specific minor pilins could help to explain the frequent co-occurrence of the non-piliated and mucoid phenotypes that are hallmarks of chronic *P. aeruginosa* lung infections.

## Introduction

*Pseudomonas aeruginosa* is a Gram-negative opportunistic pathogen, recently listed as one of the highest priority antimicrobial-resistant threats by the World Health Organization, due to its intrinsic antibiotic resistance and recalcitrance to therapy [1]. Among its virulence factors are filamentous surface appendages called type IV pili (T4P), sophisticated biological nanomachines that are broadly distributed among bacteria and archaea [2, 3]. In *P. aeruginosa*, T4P facilitate surface and host cell adhesion, colonization, biofilm maturation, virulence, and twitching, a form of surface-associated motility facilitated by cycles of extension, adhesion, and retraction of T4P fibres [3–11]. T4P are composed of hundreds to thousands of copies of small proteins called major pilins (PilA in *P. aeruginosa*) along with the low abundance minor pilins (MPs) FimU-PilVWXE [12–16]. The MPs are encoded in a polycistronic operon with the *pilY1* gene that codes for a large ~125 kDa non-pilin protein. The operon is positively regulated by the virulence factor regulator Vfr, and the two-component system (TCS) FimS (AlgZ)-AlgR. FimS is a predicted histidine sensor kinase while AlgR is a response regulator that promotes expression of genes important for biofilms and chronic cystic fibrosis (CF) lung infections [17–21]. The N-termini of immature pilins are cleaved and methylated at the cytoplasmic face of the inner membrane by the prepilin peptidase, PilD, while PilY1 may be processed by signal peptidase 1 [22–25]. Mature pilins are polymerized into a T4P fibre via an envelope-spanning assembly machinery, where individual PilA subunits are added or removed at the platform protein, PilC, via action of the ATPases PilB and PilT, respectively [2, 26].

The MPs and PilY1 are required for T4P function in several bacterial species, including *P. aeruginosa*, *Escherichia coli*, *Neisseria meningitidis*, *N. gonorrhoeae*, and *Myxococcus xanthus* [12–15, 27–30]. PilY1 and the MPs were originally proposed to oppose pilus retraction, as a few surface pili remain in *pilY1* and MP mutants when retraction is blocked via deletion of *pilT* [23, 28, 29, 31, 32]. We recently showed that when T4P MPs are missing, the equivalent minor pseudopilins of the Xcp type II secretion system can pilus prime extension in the *pilT* background, and that deletion of both sets of minor components abolishes pilus assembly [24]. We also demonstrated that PilY1 and the MPs are present in sheared pili, and that the loss of PilV, PilW, PilX, or PilY1 excludes the other three components from the pilus [24]. Thus, PilVWXY1 are proposed to form a core assembly-initiation subcomplex, while FimU and PilE are thought to connect this complex to PilA. Initiation of assembly with subsequent addition

of multiple PilA subunits would place the MPs at the pilus tip, with PilY1 –the largest component–at the distal position, supporting the hypothesis that PilY1 is a T4P-associated adhesin [31].

PilY1 and the MPs (and their regulators FimS-AlgR) are required for T4P biogenesis, and therefore T4P-mediated functions [12–15, 17, 19]. However, recent studies hinted at more enigmatic roles of PilWXY1 in virulence. Bohn et al. [33] showed that in a non-piliated *P. aeruginosa* background, subsequent loss of *pilY1* reduced virulence in a *Caenorhabditis elegans* fast killing assay and in a mouse airway infection model, and increased resistance to killing by neutrophils. Thus, PilY1 has a role in virulence that does not require functional pili. Other studies using *C. elegans* infection models suggested that MP and *pilY1* mutants had attenuated virulence relative to WT, and in one case, to a non-piliated mutant [34–37]. Recently, Siryaporn et al. [38] showed that PilWXY1 were required for surface-activated virulence towards amoebae, while other non-piliated mutants had WT virulence. The N-terminal region of PilY1 has weak sequence similarity to the eukaryotic von Willebrand factor A (VWFa) domain, which can be deformed by shear forces [39]. In-frame deletion of this domain from PilY1 allowed normally avirulent planktonic cells to kill amoebae [38]. PilY1 was therefore proposed to be a mechanosensor, where deformation of its VWFa domain upon surface interaction led–by an as-yet unknown mechanism–to increased expression of virulence factors. One important caveat of that study was that an *algR* mutant (which lacks PilY1 and the MPs) had WT virulence towards amoebae [38].

Deformation of PilA subunits by tensile forces acting upon surface-attached pili was also proposed as a possible way to signal attachment. Detection of partly unfolded pilins by the Pil-Chp chemotaxis system could lead to increased cyclic adenosine monophosphate (cAMP) synthesis via the CyaB adenylate cyclase [40, 41]. cAMP is bound by Vfr, a key transcription factor that promotes expression of virulence factors involved in motility, attachment, and secretion [20, 40, 41]. *fimS-algR* transcription is activated by Vfr, leading to increased transcription of *fimU-pilVWXY1E* [40]. PilVWXY1 were proposed to repress their own expression in an AlgR-dependent manner, as the loss of *pilV*, *pilW*, *pilX*, or *pilY1* led to elevated expression of the MP operon and *fimS-algR* [23, 33, 38, 40]. The mechanism of this putative feedback inhibition is largely uncharacterized, but was speculated to involve FimS [40].

Once expression of the MP operon is activated, extracellular PilY1 may sense surface association and transduce this information through the T4P assembly machinery [38, 40]. This signal is thought to activate an inner membrane-localized diguanylate cyclase, SadC, to increase levels of c-di-GMP, promoting expression of genes associated with a biofilm lifestyle, while repressing early-phase virulence traits such as swarming motility [40, 42]. This model was supported by studies demonstrating that loss of *pilW*, *pilX*, or *pilY1* in a high-c-di-GMP background resulted in hyper-swarming and reduced c-di-GMP levels, as measured by liquid chromatography-mass spectrometry of extracts from surface-grown cells [39, 43]. Rodesney et al. [44] showed that c-di-GMP levels increased in response to shear forces, and that functional T4P were required for this phenomenon, further supporting this hypothesis. However, unlike *pilW*, *pilX*, and *pilY1* mutants, a *sadC* mutant had WT virulence towards amoebae, suggesting the PilWXY1-SadC pathway may be important for surface sensing, but not necessarily for surface-activated virulence [38].

Although PilY1 and the MPs clearly influence virulence, the underlying mechanism remains to be established [33–36, 38, 45]. We hypothesized that a subset of these components represses FimS activity, such that loss of *pilW*, *pilX*, or *pilY1* activates FimS-AlgR, shifting the bacteria to a less pathogenic phenotype typically associated with chronic infection. We found that slow killing (SK) of *C. elegans* by *pilW*, *pilX*, and *pilY1* mutants was significantly delayed compared to WT or a *pilA* mutant, and this delay was dependent on FimS-AlgR, because

double mutants had WT killing kinetics. Hyperactivation (via phospho-mimetic point mutation) or overexpression of AlgR alone was sufficient to delay killing. Together, these data are consistent with a model where loss of PilWXY1 relieves feedback inhibition on expression of the AlgR regulon, resulting in dysregulation of virulence factors that are important for *C. elegans* pathogenesis.

## Results

### PilWXY1 modulate T4P-independent virulence in PA14 and PAO1

Specific genes in the MP operon were reported to be important for virulence in amoebae, nematodes, and mouse models, but those studies were done using different strains of *P. aeruginosa* [33–36, 38, 45]. We first confirmed these results in the *C. elegans* SK model, using two well-studied strains. SK assays were performed using PA14 with deletions of *pilA*, *fimU*, *pilV*, *pilW*, *pilX*, *pilY1*, or *pilE* (Fig 1A). An *E. coli* OP50 plate was included as a negative control for pathogenicity; worms began to senesce on these plates around day 7–8, consistent with published data regarding temperature-dependent effects on lifespan [46]. As worms at later time points were at increased risk of death due to ageing in addition to *P. aeruginosa* infection, statistical significance was assessed using the Gehan-Breslow-Wilcoxon test, which places greater weight on earlier time points [47]. A *pilA* (major pilin) mutant was slightly less pathogenic than WT; subsequent comparisons were made relative to *pilA*, since all mutants lack pili. *fimU* and *pilE* mutants were more pathogenic than the *pilA* mutant, similar to WT. In contrast, *pilW*, *pilX*, and *pilY1* mutants were less pathogenic than the *pilA* mutant, suggesting that delayed killing was not due to loss of functional T4P. Virulence of the *pilV* mutant was similar to the *pilA* mutant. The twitching and virulence defects of *pilW*, *pilX*, and *pilY1* mutants could be partially complemented by expression of the relevant gene *in trans* (S1 Fig). The stoichiometry of PilY1 and the MPs is important for optimal T4P function [23], which may explain the lack of full complementation. To verify that these phenotypes were not strain-specific, we tested PAO1

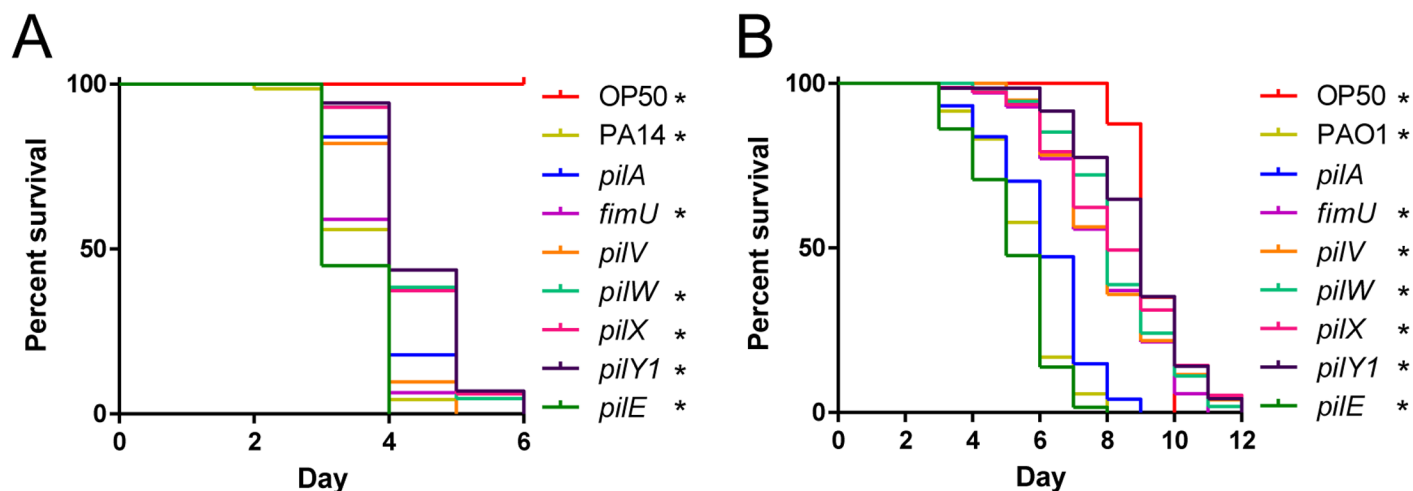

**Fig 1. PilWXY1 contribute to T4P-independent virulence.** (A) SK assays for PA14 *pilA*, *fimU*, *pilV*, *pilW*, *pilX*, *pilY1*, and *pilE* mutants. Synchronized L4 worms were seeded onto SK plates and scored for death every 24 h, then plotted as “percent survival” over the course of the assay. “Day” represents the number of days after L4 on which the plates were scored. PA14 *fimU* and *pilE* mutants had similar virulence to WT, *pilA* and *pilV* mutants were slightly less virulent than WT, and *pilW*, *pilX*, and *pilY1* mutants killed more slowly than all other strains tested. (B) SK assays for PAO1 *pilA*, *fimU*, *pilV*, *pilW*, *pilX*, *pilY1*, and *pilE* mutants. The PAO1 *pilE* mutant had similar virulence to WT, the *pilA* mutant was slightly less virulent, and *fimU*, *pilV*, *pilW*, *pilX*, and *pilY1* mutants showed significant delays in killing. In (A) and (B), asterisks indicate strains that were significantly different from a *pilA* mutant by Gehan-Breslow-Wilcoxon test at  $p = 0.05$  ( $p = 0.00625$  with a Bonferroni correction),  $n = 3$  trials.

<https://doi.org/10.1371/journal.ppat.1007074.g001>

transposon-insertion mutants of *pilA*, *fimU*, *pilV*, *pilW*, *pilX*, *pilY1*, and *pilE* in the SK assay (Fig 1B). Similar to the results in PA14, PilWXY1 were important for T4P-independent virulence. However, the *fimU* and *pilV* mutants killed nematodes more slowly than *pilA*; the PA14 and PAO1 MPs are divergent (61–75% amino acid similarity), so it is possible that FimU and PilV function slightly differently in PAO1 versus PA14 [48]. To focus on genes that were generally important for virulence of *P. aeruginosa*, we undertook studies of the mechanism responsible for delayed killing of *C. elegans* by the *pilW*, *pilX*, and *pilY1* mutants.

### PilWXY1 promote virulence in a SadC-independent manner

PilWXY1 were previously proposed to increase c-di-GMP production by SadC, such that loss of *pilW*, *pilX*, or *pilY1* resulted in a biofilm-deficient phenotype, indicative of low intracellular c-di-GMP [39, 40, 43]. Therefore, we hypothesized that biofilm defects of *pilW*, *pilX*, and *pilY1* might impede their ability to colonize the *C. elegans* gut, leading to delayed killing. The PA14 and PAO1 parent strains and their cognate *pilA*, *fimU*, *pilV*, *pilW*, *pilX*, *pilY1*, and *pilE* mutants formed negligible levels of biofilm in liquid SK medium, chosen to approximate the growth conditions used for the SK assay (S2 Fig). To assess the levels of cyclic-di-GMP in these strains, we constructed a luminescence-based *cdrA* promoter reporter based on an extensively-characterized green fluorescent protein-based reporter system [44, 49–54]. *cdrA* promoter activity has been positively correlated with c-di-GMP levels, as measured by liquid chromatography-mass spectrometry [49, 51, 53, 54]. We verified that overexpression of SadC led to a ~60-fold increase in *cdrA* promoter activity, while overexpression of AlgR, which positively regulates genes that promote c-di-GMP production [55, 56], led to a ~2-fold increase in promoter activity that was enhanced to ~4-fold when *algR* expression was increased with 0.05% L-arabinose (Fig 2A). Deletion of *sadC* or *algR* led to a ~2-fold decrease in *cdrA* promoter activity relative to WT. *cdrA* promoter activity in WT is expected to be relatively low in liquid media because c-di-GMP levels increase upon surface attachment [43]. Compared to WT, *pilW*, *pilX*, and *pilY1* had ~3-fold lower *cdrA* promoter activity, indicative of reduced c-di-GMP (Fig 2B). These results are consistent with reports that PilWXY1 promote c-di-GMP production via SadC [39, 40, 43]. We next investigated whether SadC was required for virulence, as would be predicted if decreased virulence in *pilW*, *pilX*, and *pilY1* mutants was due to dysregulation of SadC activity. A small decrease in virulence towards *C. elegans* was previously reported for a PA14 *sadC* mutant [57]; however, we saw no difference between WT and *sadC* mutants in the PA14 and PAO1 backgrounds (S3 Fig). Further, overexpression of SadC led to a hyper-biofilm phenotype *in vitro* in SK medium, but a slight delay in killing, demonstrating that the amount of biofilm formed *in vitro* does not correlate with virulence in *C. elegans* (Fig 3). Although the exact mechanisms of *P. aeruginosa* pathogenesis in *C. elegans* are not fully understood, biofilms were suggested to be important for establishment of infection [57–59]. Our *in vitro* data suggests that biofilms may not be a major contributor to *P. aeruginosa* pathogenesis in this model, but direct visualization and quantification of biofilms in the nematode gut will be required to support this conclusion.

### PilVWXY1 repress expression of the MP operon

After ruling out involvement of the SadC pathway, we explored the potential role of FimS-AlgR in PilWXY1-mediated modulation of killing kinetics. Informed by previous work in our laboratory showing that the sensor kinase PilS of the PilSR TCS interacts directly with PilA in the inner membrane to decrease PilR-dependent major pilin expression [60], we hypothesized that FimS interacts with one or more MPs, and that loss of that interaction could lead to activation of AlgR and subsequent upregulation of the MP operon. Bacterial two-hybrid (BACTH) assays



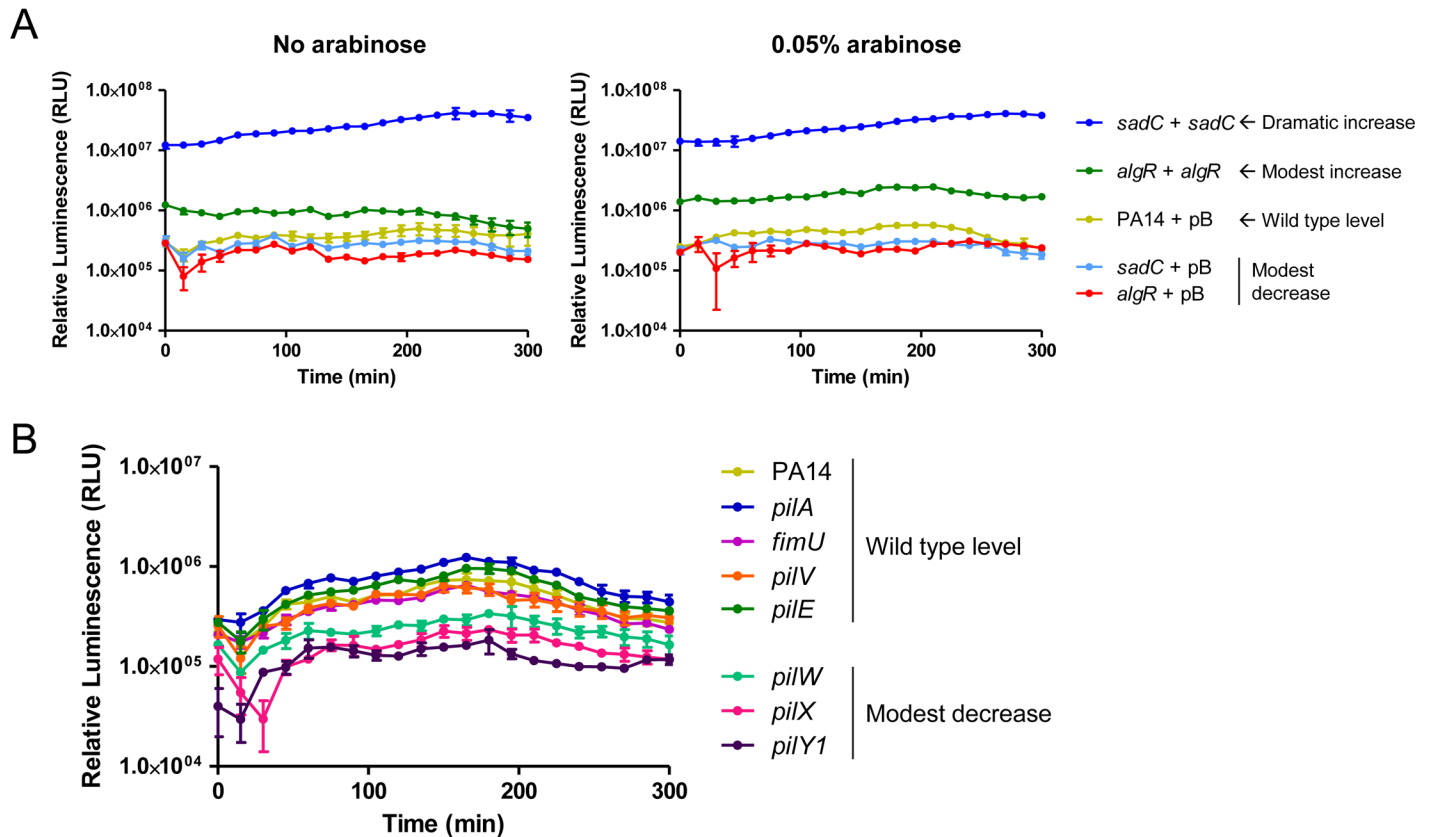

**Fig 2. *pilW*, *pilX*, and *pilY1* mutants have reduced *cdrA* promoter activity.** (A) *cdrA* promoter activity in PA14 *sadC* and *algR* deletion and overexpression strains. pMS402-*PcdrA*, containing the *lux* genes under expression of the *cdrA* promoter, was introduced into strains of interest, along with pBADGr (vector-only control), pBADGr-*sadC*, or pBADGr-*algR*. Assays were set up in technical triplicate in SK media, with or without 0.05% L-arabinose to induce expression of the pBADGr promoter, and measurements were taken every 15 min over 5 h. Loss of *sadC* or *algR* led to a subtle decrease in *cdrA* promoter activity, while SadC overexpression led to a dramatic increase in *cdrA* promoter activity. Overexpression of AlgR also led to a subtle increase in *cdrA* promoter activity that was enhanced upon addition of L-arabinose. n = 3 trials. (B) *cdrA* promoter activity in PA14 *pilA*, *fimU*, *pilV*, *pilW*, *pilX*, *pilY1*, and *pilE* mutants. Loss of *pilW*, *pilX*, or *pilY1* led to a decrease in *cdrA* promoter activity. n = 3 trials.

<https://doi.org/10.1371/journal.ppat.1007074.g002>

were used to identify potential interactions between FimS and PilA, FimU, PilV, PilW, PilX, or PilE (Fig 4A). We also screened for interaction of FimS and AlgR, which has been inferred but never demonstrated [19]. Interactions between FimS and each pilin were identified; however, based on our experience with PilS [60], binding is necessary but not sufficient for inhibition. We also demonstrated interaction of FimS and AlgR (Fig 4A), providing further support for the hypothesis that FimS is the sensor kinase for AlgR.

To decipher which MPs might modulate expression of the operon, we monitored expression from the *fimU* promoter using a *luxCDABE* reporter. Compared to WT PA14, there was a ~25-fold increase in luminescence in *pilV*, *pilW*, *pilX*, and *pilY1* mutants, which was restored to WT by expressing the corresponding pilin *in trans* (Fig 4B, S4 Fig). *fimU* and *pilA* mutants had ~5-fold increased promoter activity, while that of a *pilE* mutant was comparable to WT. *fimS* and *algR* mutants had low baseline luminescence, ~10-fold lower than WT. To determine whether the increased promoter activity in *pilV*, *pilW*, *pilX*, and *pilY1* mutants depended on FimS-AlgR, either *fimS* or *algR* was deleted in the *pilY1* mutant background. The luminescence was ~10-fold lower than WT in the *pilY1 algR* double mutant, consistent with AlgR acting as a positive regulator of the MP operon [40]. Loss of *fimS* in the *pilY1* mutant background also abolished *fimU* promoter activity (~10-fold lower than WT), supporting the idea that FimS

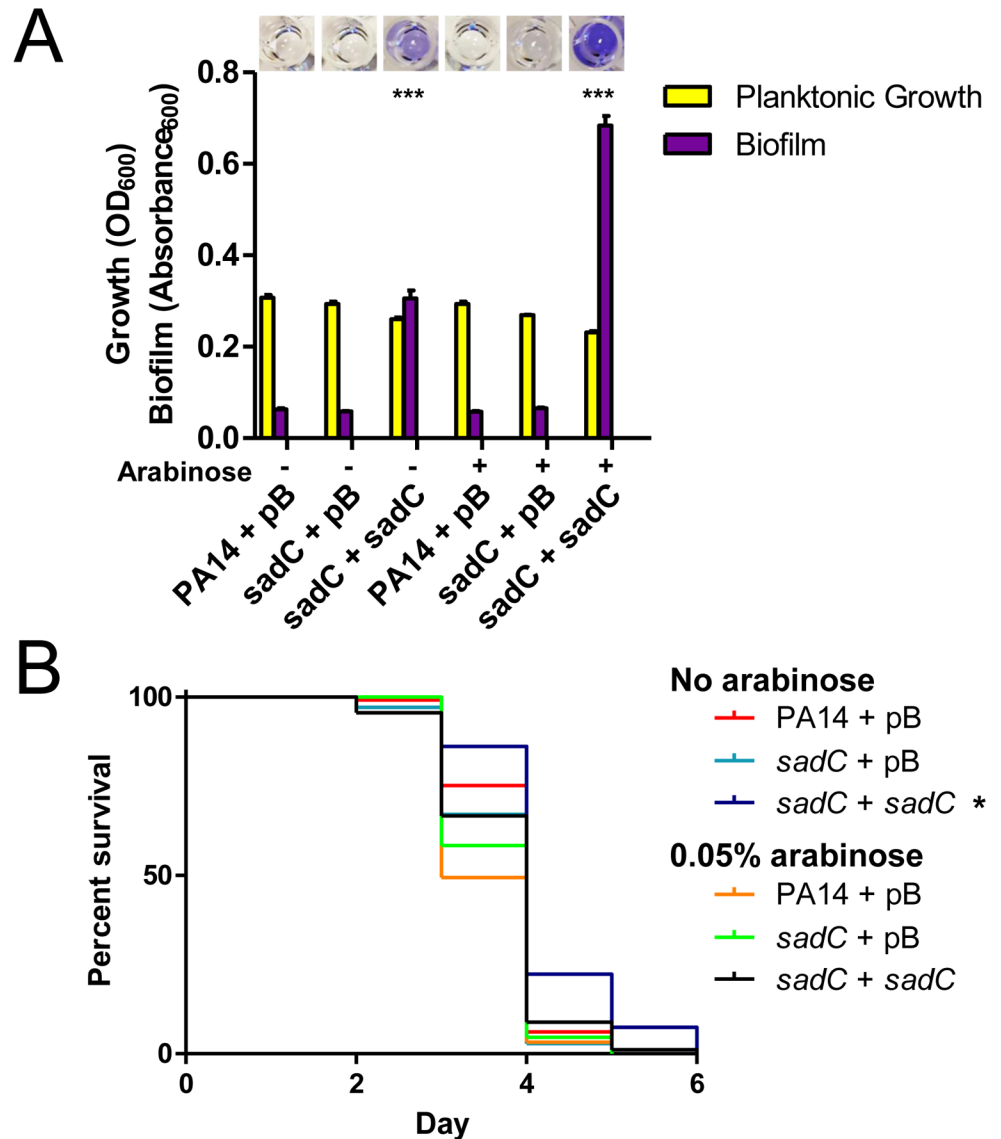

**Fig 3. SadC promotes biofilm formation but is not required for virulence.** (A) Biofilm assays for *sadC* deletion and overexpression strains. PA14 *sadC* biofilm levels were similar to WT. Expression of SadC *in trans* from a multicopy plasmid led to increased biofilm formation relative to WT at 0% (due to leaky promoter) and 0.05% L-arabinose,  $p < 0.001$ . Significance was determined by one-way ANOVA followed by Dunnett post-test relative to PA14 + pBADGr,  $n = 3$ . (B) SK assays for *sadC* deletion and overexpression strains. Overexpression of SadC led to a subtle but reproducible delay in killing relative to WT at 0% L-arabinose. A *sadC* mutant was similar to WT. Asterisks indicate strains that were significantly different from PA14 + pBADGr by Gehan-Breslow-Wilcoxon test at  $p = 0.05$  ( $p = 0.0125$  with a Bonferroni correction),  $n = 3$ .

<https://doi.org/10.1371/journal.ppat.1007074.g003>

may monitor PilVWXY1 and activate AlgR when their levels drop. Based on these data, PilA, FimU, and PilE are unlikely to modulate FimS-AlgR activity even though they can interact with FimS.

PilVWXY1 were previously proposed to form a complex in the inner membrane, such that loss of any one component destabilizes the others [24]. Since PilY1 is thought to be cleaved on the periplasmic side of the inner membrane, it is unlikely to interact directly with the trans-membrane domains of FimS [24]. Thus, we suspected that high *fimU* promoter activity in the *pilY1* mutant was due to reduced levels of one or more of the other pilins. To address this, we

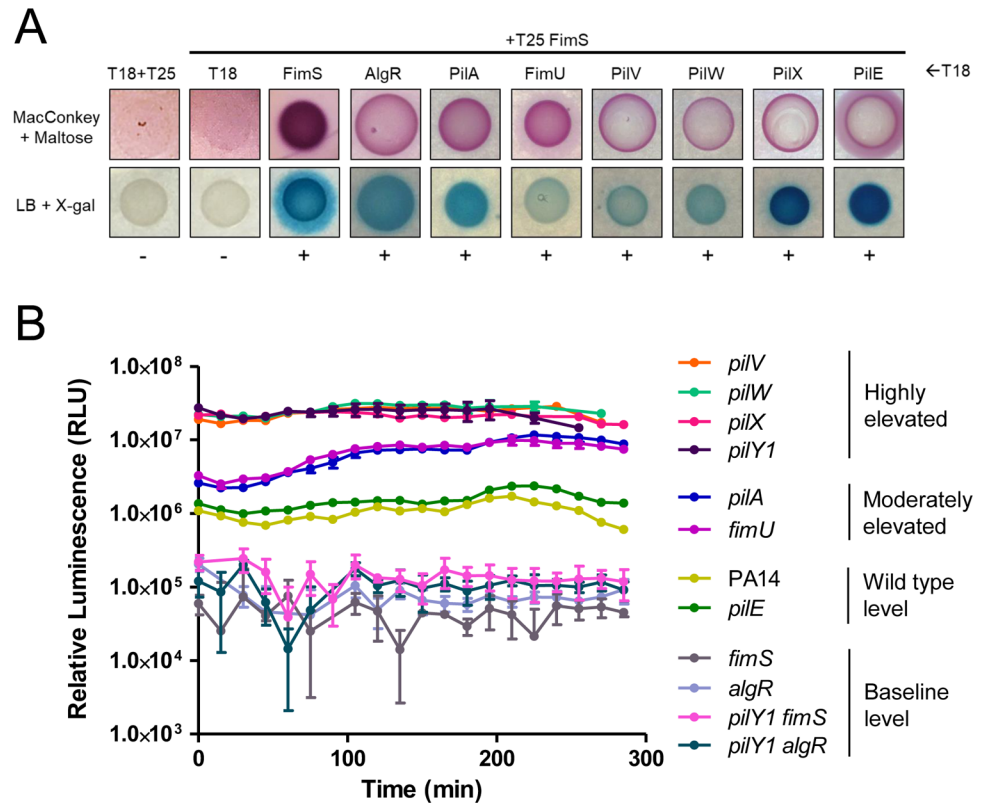

**Fig 4. PilVWXY1 repress their expression via FimS-AlgR.** (A) BACTH assays for FimS, AlgR, PilA, and MPs. Protein fusions with T18 and T25 fragments of the CyaA adenylate cyclase were screened for interactions on MacConkey and LB + X-gal plates. FimS interacted with itself, AlgR, PilA, FimU, PilV, PilW, PilX, and PilE. Positive (+) or negative (-) interactions are indicated below each image, n = 3. (B) *fimU* promoter activity in PA14 *pilA*, *fimU*, *pilV*, *pilW*, *pilX*, *pilY1*, *pilE*, *fimS*, *algR*, *pilY1 fimS*, or *pilY1 algR* mutants. pMS402-*PfimU*, containing the *fimU* promoter upstream of the *lux* genes, was introduced into strains of interest. Loss of *pilV*, *pilW*, *pilX*, or *pilY1* led to highly elevated *fimU* promoter activity. *pilA* and *fimU* mutants had moderately increased *fimU* promoter activity relative to WT. *fimS* and *algR* mutants had negligible luminescence, and loss of *fimS* or *algR* also reverted *fimU* promoter activity in the *pilY1* mutant to baseline. n = 3 trials.

<https://doi.org/10.1371/journal.ppat.1007074.g004>

overexpressed FimU, PilV, PilW, PilX, or PilE in the *pilY1* mutant and measured *fimU* promoter activity. All these strains had luminescence comparable to the *pilY1* mutant (S4 Fig). Conversely, distinct effects have been observed in other studies upon overexpression of PilY1 [39, 40, 43]. Therefore, we overexpressed PilY1 in the *pilW* and *pilX* (high-luminescence) backgrounds; but PilY1 alone was insufficient to alter *fimU* promoter activity. Together, the data suggest that no individual component of the PilVWXY1 subcomplex is capable of modulating FimS activity when others are absent.

We also tested whether PilD processing of PilVWX was required for modulation of FimS activity. We constructed a *pilD* mutant, which lacks twitching motility because unprocessed pilins remain in the inner membrane [23, 61]. The absence of *pilD* had no impact on *fimU* promoter activity (S5 Fig), and a *pilD* mutant had virulence equivalent to a *pilA* mutant, likely attributable to its lack of T4P. Thus, PilVWX can modulate FimS activity in their unprocessed form.

### Hyperactivation of AlgR delays killing

Because the results suggested that loss of PilWXY1 relieves feedback inhibition on FimS-AlgR, resulting in AlgR activation, we tested whether hyperactivation of AlgR alone could delay



killing of *C. elegans*. We made chromosomal *algR*<sub>D54E</sub> phospho-mimetic point mutants [62] in both PA14 and PAO1 backgrounds. We also made *algR*<sub>D54A</sub> point mutants, as AlgR phosphorylation is required for transcription of a subset of genes in its regulon, including the MP operon [17, 62, 63]. We verified that the *algR*<sub>D54A</sub> mutant was defective for twitching motility, while the *algR*<sub>D54E</sub> mutant had WT twitching (S6 Fig). Unexpectedly, a *fimS* mutant retained ~50% twitching motility, in contrast to previous reports [18, 62]. In the absence of FimS, AlgR might be phosphorylated by small phosphate donors [64]. Based on the *fimS* data, we also questioned the assumption that AlgR phosphorylation was necessary for expression from the *fimU* promoter. When we overexpressed WT AlgR or AlgR<sub>D54A</sub> in the *algR* mutant (S6 Fig), its twitching defect was fully complemented by AlgR, and partially complemented (25%) by AlgR<sub>D54A</sub>. Thus, although it increases binding to the *fimU* promoter [17, 62], phosphorylation of AlgR is not essential for transcription of the MP operon.

SK assays were then performed for PA14 and PAO1 *algR*<sub>D54A</sub> and *algR*<sub>D54E</sub> mutants, plus PA14 and PAO1 *fimS* and *algR* deletion mutants. PA14 and PAO1 *algR*<sub>D54E</sub> mutants killed more slowly than the corresponding WT strains, while *fimS*, *algR* and *algR*<sub>D54A</sub> mutants had WT virulence (Fig 5A and 5B). Loss of FimS-AlgR decreases expression of the MPs and PilY1 and prevents pilus assembly [17, 40]. Because our data show that loss of FimS-AlgR (and thus MP expression) had no impact, we conclude that delayed killing of nematodes by *pilW*, *pilX*, and *pilY1* mutants is due to inappropriately timed FimS-AlgR activation.

### Overexpression of AlgR delays killing

Increased transcription of *fimS*-*algR* in a *pilY1* mutant relative to WT has been reported [38], suggesting that delayed killing could arise through expression of increased amounts of the FimS-AlgR TCS, as well as its activation. Therefore, we asked whether increased AlgR levels would attenuate virulence, as previously demonstrated in a mouse infection model [65]. When *algR* was expressed *in trans* from a multicopy plasmid in PA14 *algR*, killing was delayed compared to the vector control (Fig 6A). Because un-phosphorylated AlgR can also affect transcription of a subset of genes [66, 67], we tested the same mutant complemented with AlgR<sub>D54A</sub>. Complementation of the *algR* mutant with AlgR<sub>D54A</sub> resulted in a severe delay in killing relative to the vector-only control. Thus, AlgR hyperactivation and overexpression independently diminish *P. aeruginosa* virulence towards *C. elegans*. Lastly, as AlgR is a positive regulator of biofilm formation [17, 55, 56], we performed biofilm assays for PA14 *algR* complemented with AlgR or AlgR<sub>D54A</sub>. Expression of either variant led to hyper-biofilm formation (Fig 6B), further emphasizing that the ability of a strain to form biofilms in SK medium does not correlate with virulence in worms. Instead, we suggest that virulence factors repressed by FimS-AlgR are important for *C. elegans* SK, and an increase in AlgR levels and/or activity at the wrong time delays killing.

### The virulence defects of *pilW*, *pilX* and *pilY1* mutants are dependent on FimS-AlgR

To provide further support for this model, we asked whether the virulence defects of PA14 *pilW*, *pilX*, and *pilY1* mutants required FimS-AlgR. We deleted *fimS* or *algR* in the *pilW*, *pilX*, and *pilY1* backgrounds, and tested virulence of the double mutants (Fig 7). We also deleted *pilW*, *pilX*, and *pilY1* in the *algR*<sub>D54A</sub> background, to test if AlgR activation was necessary for the delayed killing by *pilW*, *pilX*, and *pilY1* mutants. In all cases, the double mutants had WT virulence, equivalent to that of the *fimS*, *algR*, or *algR*<sub>D54A</sub> single mutants. These results demonstrate that the delay in killing that results from loss of PilWXY1 requires both FimS and AlgR. Although overexpression of AlgR<sub>D54A</sub> *in trans* repressed virulence (Fig 6A), the

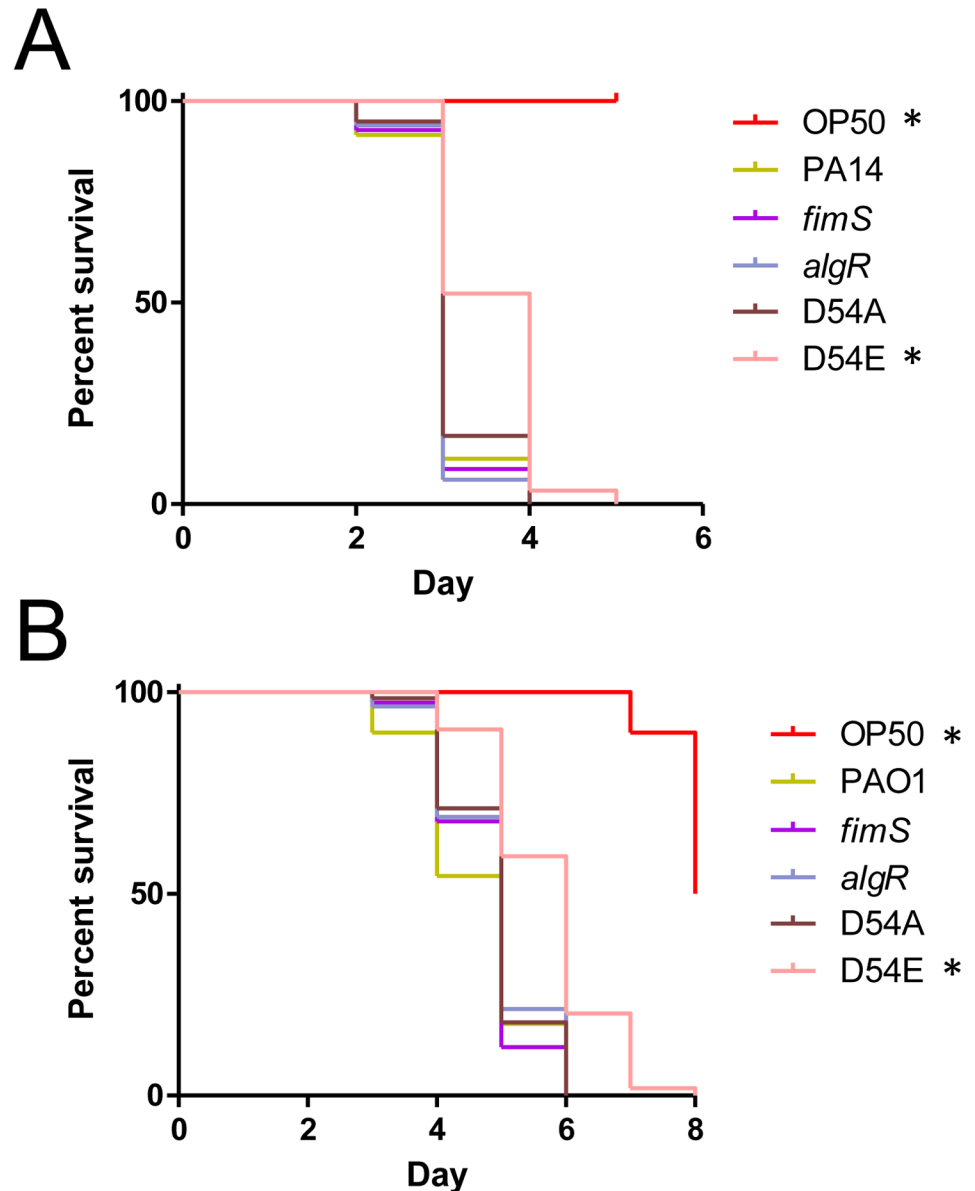

**Fig 5. AlgR hyperactivation delays killing.** SK assays for (A) PA14 and (B) PAO1 *fimS*, *algR*, *algR*<sub>D54A</sub>, and *algR*<sub>D54E</sub> mutants. The *fimS*, *algR*, and *algR*<sub>D54A</sub> mutants had WT virulence, while the *algR*<sub>D54E</sub> mutants showed delays in killing. For (A) and (B), asterisks indicate strains that were significantly different from WT by Gehan-Breslow-Wilcoxon test at  $p = 0.05$  ( $p = 0.01$  with a Bonferroni correction),  $n = 3$  trials.

<https://doi.org/10.1371/journal.ppat.1007074.g005>

chromosomal mutation was sufficient to alleviate delayed killing by *pilW*, *pilX*, and *pilY1* mutants, suggesting that AlgR phosphorylation is important for modulation of virulence when PilWXY1 are missing.

The sigma factor AlgU ( $\text{AlgT}/\sigma^{22}/\sigma^E$ ) acts upstream of FimS-AlgR to promote *algR* transcription [68–70], thus we tested its potential involvement in modulation of virulence by PilWXY1. An *algU* mutant killed more rapidly than WT (Fig 8), as previously demonstrated in mouse models [71], while *pilW algU*, *pilX algU*, and *pilY1 algU* double mutants had near-WT virulence (less than an *algU* mutant, but more than *pilW*, *pilX*, and *pilY1* single mutants). Although AlgU promotes *algR* transcription [69], loss of AlgU alone does not prevent AlgR

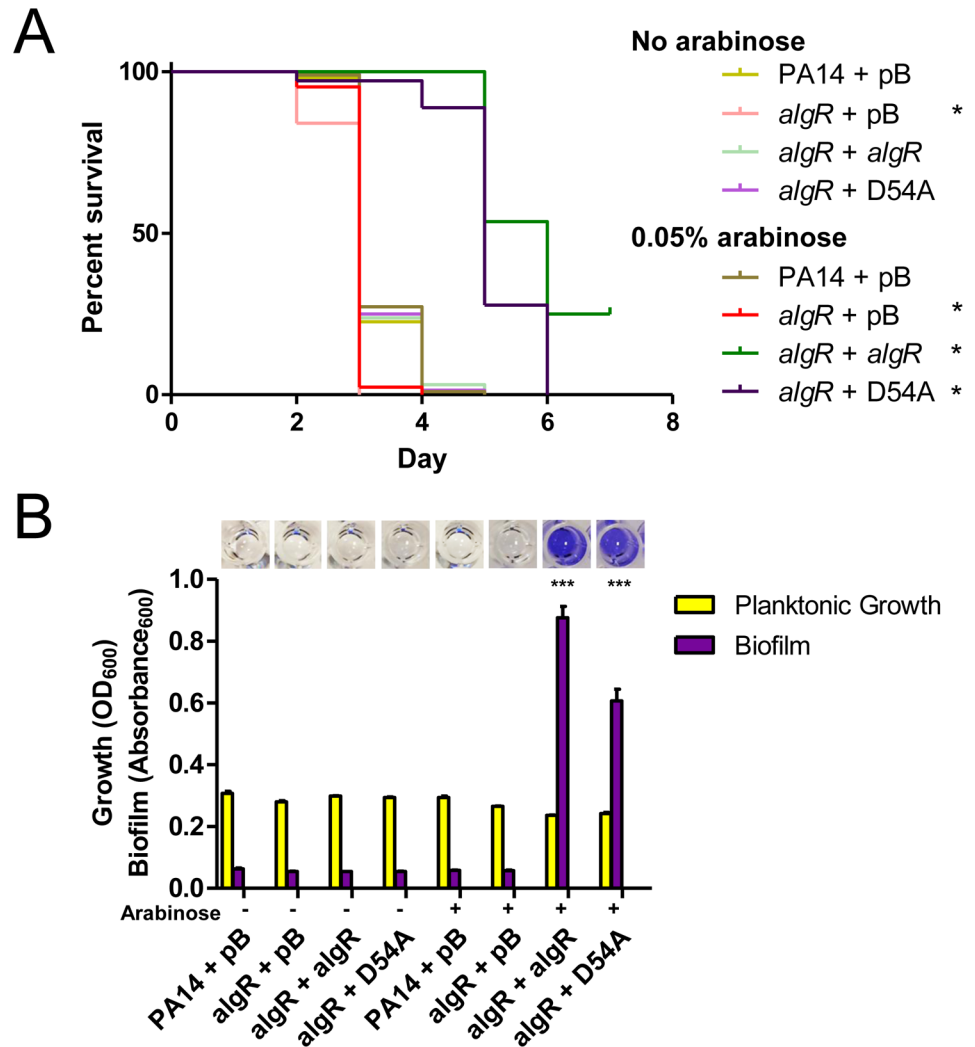

**Fig 6. AlgR promotes biofilm formation and delays killing.** (A) SK assays for *algR* deletion and overexpression strains. Loss of *algR* led to a small increase in virulence, while overexpression of pBADGr-*algR* or pBADGr-*algR*<sub>D54A</sub> delayed killing at 0.05% L-arabinose. Asterisks indicate strains that were significantly different from PA14 + pBADGr by Gehan-Breslow-Wilcoxon test at  $p = 0.05$  ( $p = 0.00833$  with a Bonferroni correction),  $n = 3$  trials. (B) Biofilm assays for *algR* deletion and overexpression strains. Microtiter plate biofilm assays were performed in liquid SK media over 24 h, in triplicate. Biofilms were stained with 1% crystal violet then solubilized in acetic acid. Loss of *algR* had no effect on biofilm formation. When grown at 0.05% L-arabinose, overexpression of pBADGr-*algR* or pBADGr-*algR*<sub>D54A</sub> increased biofilm formation,  $p < 0.001$ . Significance was determined by one-way ANOVA followed by Dunnett post-test relative to WT,  $n = 3$  trials.

<https://doi.org/10.1371/journal.ppat.1007074.g006>

expression [68]. Given the reduced virulence of the *pilW algU*, *pilX algU*, and *pilY1 algU* double mutants relative to *algU*, PilWXY1 modulation of FimS-AlgR signalling appears to be intact in the *algU* mutant. These data are consistent with studies showing that *mucA* and *mucD* mutants, in which *algR* and *algU* are highly transcribed [69, 72–74], are less virulent towards *C. elegans* [75–77].

## Discussion

*P. aeruginosa* uses T4P to attach to surfaces and host cells, for biofilm maturation, and to move across surfaces via twitching motility [2]. The MPs and PilY1 are important players in T4P

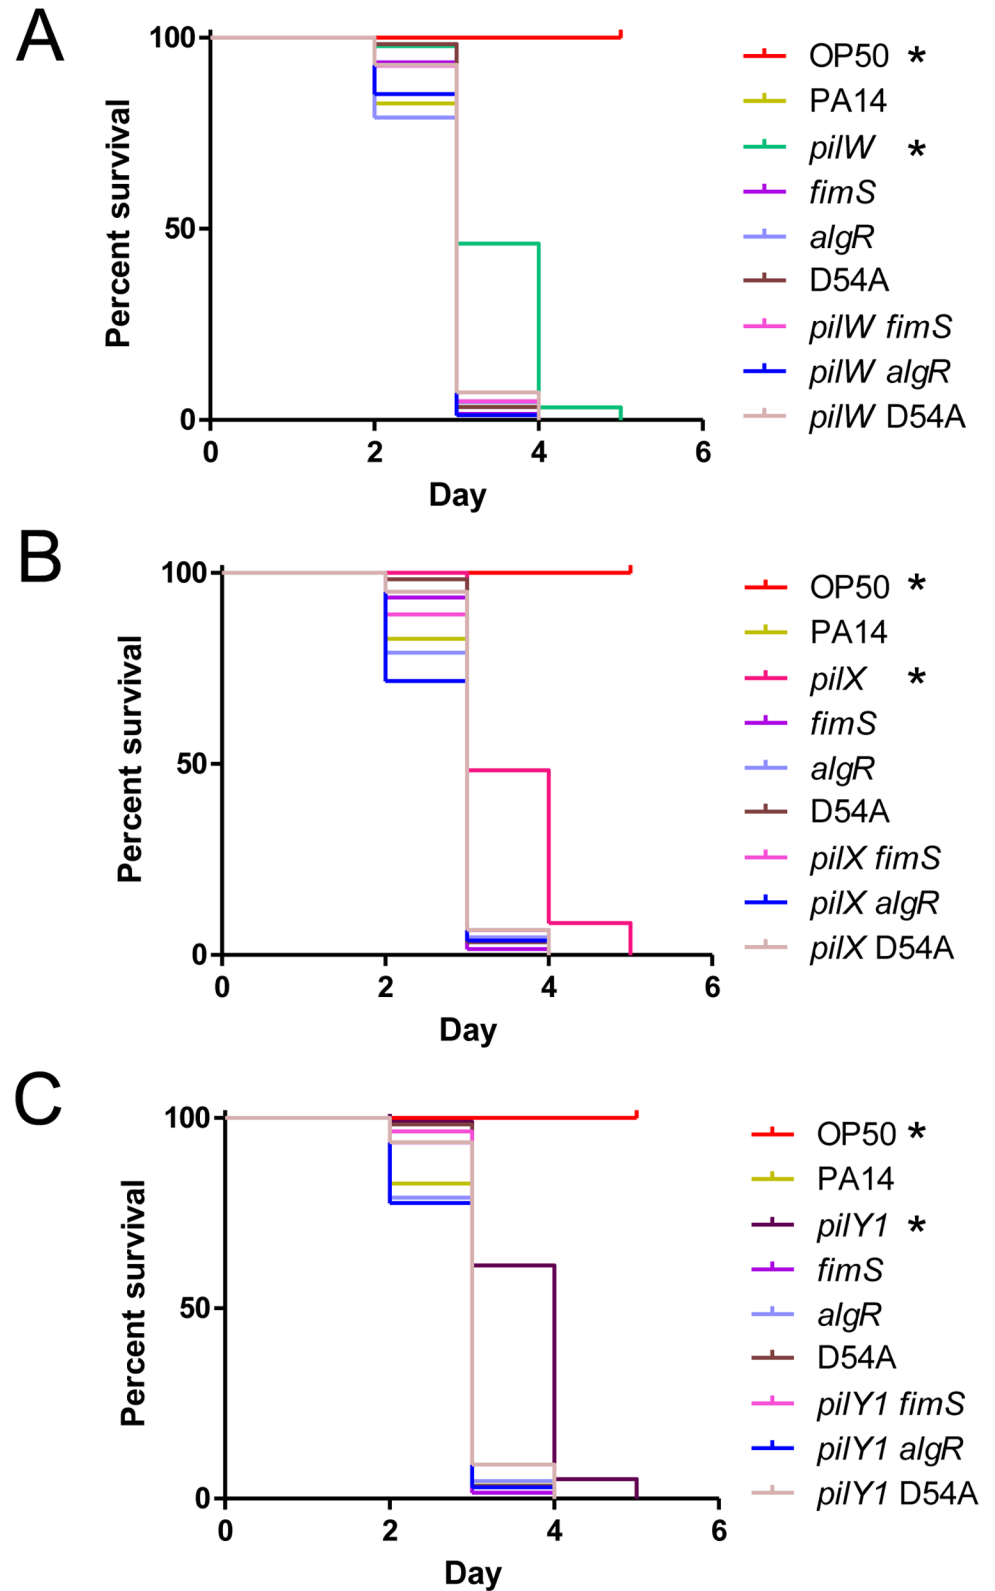

**Fig 7. Delayed killing by *pilW*, *pilX*, and *pilY1* mutants is dependent on FimS-AlgR.** SK assays for *pilW*, *pilX*, *pilY1*, *fimS*, *algR*, and *algR<sub>D54A</sub>* single and double mutants. *fimS*, *algR*, and *algR<sub>D54A</sub>* mutants have WT virulence. *pilW*, *pilX*, and *pilY1* killed more slowly relative to WT, *fimS*, *algR*, and *algR<sub>D54A</sub>* mutants. Combination of *pilW*, *pilX*, or *pilY1*

mutations with *fimS*, *algR*, or *algR*<sub>D54A</sub> mutations results in killing equivalent to *fimS*, *algR*, and *algR*<sub>D54A</sub> single mutants, respectively. All graphs represent 1 trial, separated into 3 graphs where strains relevant to (A) *pilW*, (B) *pilX*, and (C) *pilY1* mutants are included. Asterisks indicate strains that were less virulent than PA14 by Gehan-Breslow-Wilcoxon test at  $p = 0.05$  ( $p = 0.003125$  with a Bonferroni correction),  $n = 3$ .

<https://doi.org/10.1371/journal.ppat.1007074.g007>

biogenesis and function, but also in regulation of swarming motility, surface attachment, mechanosensation, and virulence [38–40, 43]. The MP operon is positively regulated by FimS-AlgR, a TCS implicated in regulation of chronic *P. aeruginosa* lung infections [17–19]. Here, we explored the connection between loss of PilWXY1 (and thus, loss of T4P) and AlgR activation in virulence towards *C. elegans*, as summarized in Fig 9. We showed that *pilW*, *pilX*, and *pilY1* mutants kill nematodes more slowly than WT or a *pilA* mutant, supporting the idea that PilWXY1 modulate virulence independently of their role in T4P assembly. We confirmed previous reports [23, 33, 40] that in the absence of *pilV*, *pilW*, *pilX*, or *pilY1*, expression of the MP operon is significantly increased, and that this requires FimS-AlgR. Either hyperactivation or overexpression of AlgR delayed killing, while loss of *fimS* or *algR* in *pilW*, *pilX*, or *pilY1* reverted virulence to WT levels.

These data—coupled with BACTH data showing that the MPs interact directly with FimS in the inner membrane (Fig 4)—suggest that FimS may act as a molecular thermostat to monitor MP levels, and in their absence, activates AlgR to upregulate expression of the MP operon. A similar inventory control mechanism was recently described for the PilSR TCS, where PilS phosphorylates PilR when PilA levels are low, and dephosphorylates PilR when PilA levels are high [60]. It is not yet clear if FimS responds to changes in levels of the PilVWXY1 subcomplex, thought to prime assembly of T4P [24, 78, 79]. When overexpressed individually *in trans*, each of the MPs inhibited twitching motility in PAO1 [23], but since the others were still expressed from the chromosome, the exact nature of the signal detected by FimS remains to be determined. When expressed *in trans*, no single component of the PilVWXY1 subcomplex reduced *fimU* promoter activity if others were absent (S4 Fig). The specific signal that inhibits FimS activity remains to be deciphered. Whether the FimS-inhibitory signal is the same in PA14 and PAO1 also remains unknown. Though PilWXY1 modulated virulence of PA14 and PAO1, FimU and PilV influenced virulence only in PAO1 (Fig 1A and 1B). Given the MPs are

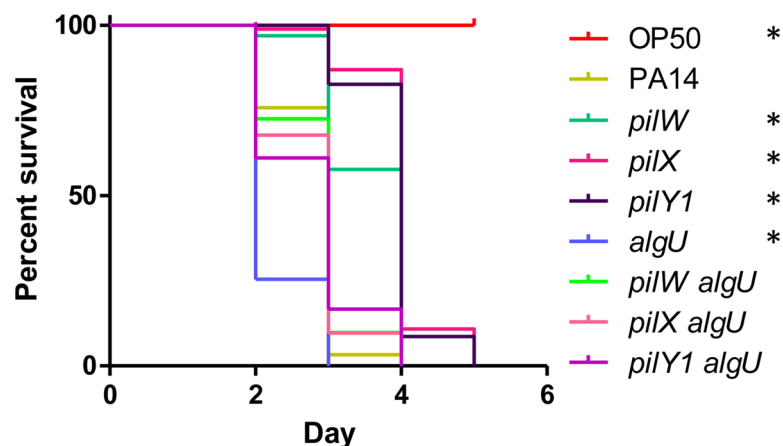

**Fig 8. PilWXY1-mediated modulation of virulence is not dependent on AlgU.** SK assays for PA14 *pilW*, *pilX*, *pilY1*, *algU*, *pilW algU*, *pilX algU*, and *pilY1 algU* mutants. Loss of *algU* led to more rapid killing relative to WT, while *pilW algU*, *pilX algU*, and *pilY1 algU* mutants had near-WT virulence. Asterisks indicate strains that were significantly different from PA14 by Gehan-Breslow-Wilcoxon test at  $p = 0.05$  ( $p = 0.00625$  with a Bonferroni correction),  $n = 3$ .

<https://doi.org/10.1371/journal.ppat.1007074.g008>



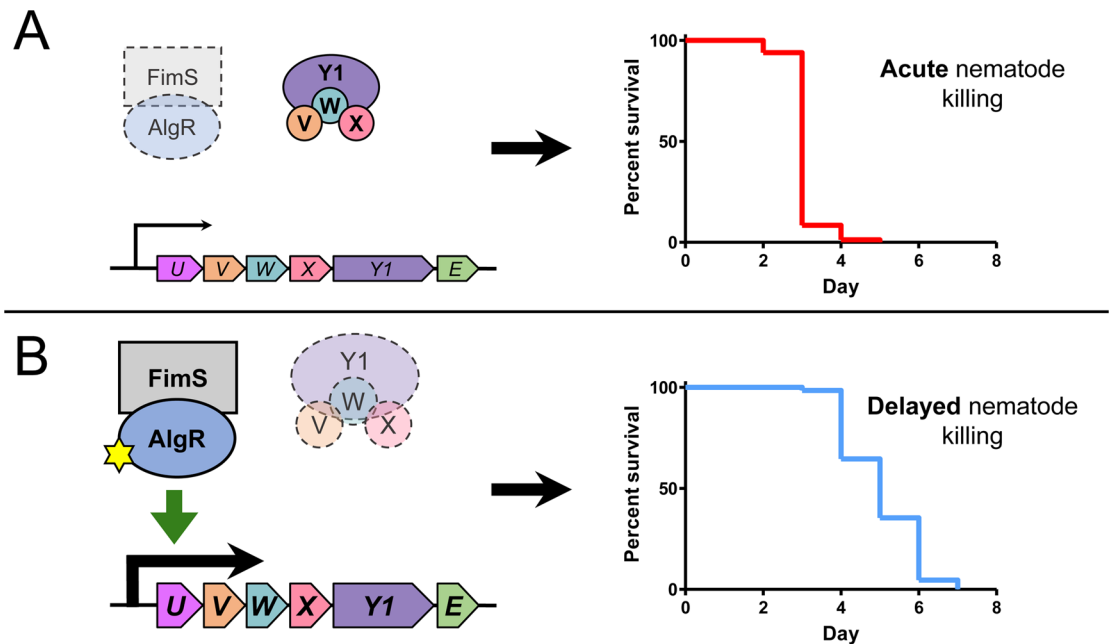

**Fig 9. Model for regulation of the MPs and virulence by FimS-AlgR.** (A) Loss or inactivation of FimS-AlgR results in sustained WT (acute) virulence towards *C. elegans*. Under normal conditions, PilVWXYZ1 suppress FimS activation of AlgR, leading to reduced expression of the MPs and increased expression of acute virulence factors. These phenotypes are mimicked by genetic inactivation of AlgR (D54A) or deletion of *fimS* or *algR*. (B) Loss of PilVWXYZ1 frees FimS to activate AlgR, leading to increased expression of the MPs, reduced expression of acute virulence factors, and delayed nematode killing. Hyperactivating mutations in AlgR (D54E) phenocopy this mechanism. Abbreviations: *fimU*, U (magenta); *pilV*, V (orange); *pilW*, W (teal); *pilX*, X (pink); *pilY1*, Y1 (purple); *pilE*, E (green). Yellow star indicates phosphorylation.

<https://doi.org/10.1371/journal.ppat.1007074.g009>

divergent, FimU and PilV may play different roles in PAO1 versus PA14 [48]. It is possible that FimU and PilV are more important for stability of the PilWXYZ1 subcomplex in PAO1 than in PA14, and/or that PAO1 FimU and PilV can directly modulate FimS activity.

Kuchma et al. [39, 43] reported that loss of *pilW*, *pilX*, or *pilY1* increased swarming motility and decreased biofilm formation, both indicative of low c-di-GMP levels. As biofilms were proposed to contribute to *P. aeruginosa* pathogenesis in *C. elegans*, we investigated whether the reduction in virulence in the absence of PilWXYZ1 was linked to decreased biofilm via loss of SadC activation [57–59, 80]. In our hands, levels of *sadC* had no impact on virulence even though they clearly modulated the amount of biofilm produced in SK media (Fig 3A and 3B, S3 Fig). Irazoqui et al. [59] examined the *C. elegans* gut during *P. aeruginosa* infection and described extracellular material that they suggested might indicate presence of a biofilm. Anti-biofilm compounds reduced *P. aeruginosa* virulence towards *C. elegans*, but a mechanism of action for those compounds has not been described [58]. Recently, the small RNA *SrbA* was shown to modulate both biofilm and virulence towards *C. elegans*; however, deletion of *srbA* led to altered transcription of at least 26 other genes that may also affect virulence [81].

Rather than using standard biofilm media, we performed these assays in liquid SK media to more closely mimic the conditions to which bacteria are exposed in the SK assay. To our knowledge, this is the first report to use SK media for biofilm assays. As we found no correlation between biofilm formation and virulence, we suggest that acute-phase virulence factors may be more important for *C. elegans* pathogenesis in the SK model. However, we recognize that *in vitro* biofilm assays may not replicate the conditions within the *C. elegans* gut; direct visualization of bacteria in worms will be needed to clarify the role of biofilm formation.

PilY1 and the MPs have been implicated in surface detection and activation of virulence, via signalling through SadC [38, 40]. Because loss of PilY1 or the MPs prevents T4P assembly and function, it is crucial to distinguish phenotypes resulting from lack of specific proteins versus loss of piliation [24]. Luo et al. [40] suggested that association of PilY1 with surfaces transduces a signal through the T4P machinery to stimulate c-di-GMP production by SadC, while Rodesney et al. [44] showed that loss of *pilA*, *pilY1*, or *pilT* prevents surface-activated c-di-GMP production. Rodesney et al. [44] proposed that both PilY1 and functional T4P are required for mechanosensation; however, it is not possible to delete *pilY1* without ablating T4P assembly. Our *cdrA* promoter reporter data support the idea that PilWXY1 promote cyclic-di-GMP production by SadC, as loss of *pilW*, *pilX*, or *pilY1* decreased *cdrA* promoter activity (Fig 2B). However, we argue that the PilWXY1-SadC pathway—though important for c-di-GMP signalling—is not critical for virulence towards *C. elegans*. Instead, our data show that PilWXY1-FimS-AlgR signalling axis is responsible for T4P-independent changes in virulence of *pilW*, *pilX*, and *pilY1* mutants. Thus, surface attachment may induce c-di-GMP production via PilWXY1-SadC [40, 43], while the brief trapping of T4P outside the cell upon contact with a surface might transiently deplete PilVWXY1 levels in the inner membrane, resulting in increased FimS-AlgR activity and transition towards a sessile, biofilm lifestyle.

Whether the loss of *pilW*, *pilX*, or *pilY1* leads to increased amounts of AlgR, its increased phosphorylation via FimS, or both, remains to be clarified. Okkotsu et al. [62] showed that AlgR and AlgR<sub>D54E</sub> levels are comparable, suggesting that the delay in killing we observed for PA14 *algR*<sub>D54E</sub> is attributable to the D54E phospho-mimetic mutation alone. Overexpression of AlgR<sub>D54A</sub> *in trans* delayed killing (Fig 6A), but the same mutation on the chromosome reverted virulence of *pilW*, *pilX*, and *pilY1* mutants to WT levels (Fig 7). Therefore, we suspect that it is primarily AlgR phosphorylation (or lack of AlgR dephosphorylation) that leads to delayed killing. However, it is possible that both increased AlgR protein levels and phosphorylation contribute. Kong et al. [55] showed that AlgR binds *fimS*-*algR*, suggesting that the TCS could positively regulate its own transcription in response to reduced PilWXY1 levels.

In addition to being essential for T4P function, FimS and AlgR control alginate production in the context of chronic CF infections, where *algR* transcription is high [18, 82]. Phosphorylation of AlgR increases binding affinity at some—but not all—of its target sequences [17, 62, 63, 67]. For example, AlgR<sub>D54N</sub> failed to support twitching motility, but did not affect alginate production [17, 63]. Our twitching motility data suggests that AlgR<sub>D54A</sub> is capable of binding to the *fimU* promoter, albeit less efficiently than WT AlgR (S6 Fig). FimS is an unorthodox histidine kinase, with four transmembrane domains instead of the typical two, and lacks both a periplasmic sensing domain and the canonical motif involved in ATP coordination that mediates auto-phosphorylation [19, 83]. Direct interaction and/or phospho-transfer between FimS and AlgR have not been reported. Rather, the idea that FimS acts as a kinase for AlgR comes from this and other studies demonstrating similar phenotypes for *fimS*, *algR*, and *algR*<sub>D54N</sub> mutants [17, 18, 84]. Here, we demonstrated that FimS and AlgR interact in the BACTH assay (Fig 4) lending further support to this model.

FimS and AlgR promote expression of genes important for production of alginate, biofilms, and c-di-GMP, and inhibit expression of the T3SS, pyocyanin, and quorum sensing [55, 56, 74, 85, 86]. The observation that the loss of *algR* had no impact on virulence towards amoebae [38] or nematodes (Fig 5A and 5B) suggests that the AlgR-activated genes may not contribute to virulence, although the mechanisms of killing could differ. In mouse models, *fimS* and *algR* deletion mutants are attenuated, though overexpression of AlgR also markedly reduces virulence [55, 65, 87]. Further, Little et al. demonstrated that PAO1 *algR*<sub>D54E</sub> had WT virulence in *Drosophila melanogaster* and mouse infection models, while an *algR*<sub>D54A</sub> mutant was highly attenuated [87]. The outcomes that result from interaction of *P. aeruginosa* with different

hosts will depend on a combination of factors including host defenses, site of infection, available nutrients, and virulence repertoire of a particular strain. However, our results suggest that changes in the specific repertoire of bacterial virulence factors, or the timing of their production, can tip the balance in the host's favour.

The subset of AlgR-regulated virulence genes important for *C. elegans* pathogenesis is not defined. Screening of a PA14 transposon library for loss of virulence implicated several genes encoding regulators rather than individual virulence factors, suggesting that *C. elegans* pathogenesis is multifactorial [35]. Consistent with this hypothesis, a study of 18 WT *P. aeruginosa* strains revealed no correlation between pathogenicity and any specific virulence factors [88]. We saw WT or greater levels of virulence for *algR* and *algU* mutants, respectively, consistent with a role for AlgRU in repression of acute phase virulence factors (Figs 5 and 8). Factors under positive control of AlgRU (chronic-phase virulence factors) may be important during later stages of infection in more complex mammalian infection models, but not crucial for pathogenesis in nematodes [89, 90]. In support of this hypothesis, past studies have demonstrated that increased mucoidy, via mutation of *mucA* or *mucD*, reduced nematode killing [75–77].

While important for the initial stages of infection, T4P are often lost over time in chronic CF lung infections [5, 91, 92]. *P. aeruginosa* CF isolates frequently become mucoid via activation of AlgR, and production of many virulence factors is reduced [82, 93, 94]. Although the two outcomes are not necessarily temporally or mechanistically linked, mutations that achieve both may be advantageous during chronic CF lung infections. Specifically, loss of PilWXY1 may be adaptive in the context of CF, leading to AlgR activation. To test this idea, it will be interesting to examine the genotypes of mucoid CF isolates for these types of mutations. In conclusion, our results suggest that PilWXY1 promote virulence towards *C. elegans* by inhibiting FimS-AlgR activation. These data demonstrate how loss of one virulence factor (T4P) may activate others (via AlgR). Because the interplay between virulence factors in *P. aeruginosa* is complex and dynamic, careful consideration will be required when designing potential anti-virulence therapeutic strategies.

## Materials and methods

### Bacterial strains and plasmids

Strains and plasmids used in this work are listed in [S1 Table](#). Bacteria were grown at 37°C for 16 h in 5 ml lysogeny broth (LB) Lennox, or on 1.5% agar LB plates, unless otherwise specified. Plasmids were transformed into chemically-competent *E. coli* by heat-shock, and into *P. aeruginosa* by electroporation [95]. Where appropriate, gentamicin (Gm) was added at 15 µg/ml for *E. coli*, and 30 µg/ml for *P. aeruginosa*. Kanamycin (Kan) was added at 50 µg/ml for *E. coli*, and 150 µg/ml for *P. aeruginosa*. Ampicillin (Amp) was added at 100 µg/ml for *E. coli*. L-arabinose was added at 0.05% where indicated to induce expression from the pBADGr promoter [96].

### Cloning procedures

Vectors were constructed using standard cloning procedures, using the primers listed in [S2 Table](#). Deletion constructs were designed to contain 500–1000 bp homology upstream and downstream the gene to be deleted. Deletion constructs for PA14 *fimU*, *pilV*, *pilW*, *pilX*, *pilY1*, and *pilE* were synthesized by Genscript in the pUC57Kan vector. pEX18Gm-*sadC* was created by amplifying the *sadC* deletion region from PA14 *sadC roeA* [42], followed by digestion and ligation into pEX18Gm. pEX18Gm-*fimS*, pEX18Gm-*algR*<sub>D54A</sub>, and pEX18Gm-*algR*<sub>D54E</sub> were made by overlap extension PCR [97]. Restriction digestion followed by ligation of the

upstream and downstream fragments was used to create the deletion constructs pEX18Gm-*algR*, pEX18Gm-*algU*, and pEX18Gm-*pilD*. pMS402-*PfimU* and pMS402-*PcdrA* were created by amplifying and digesting the promoter regions of the PA14 MP operon and *cdrA* gene, respectively. Digested pBADGr was treated with alkaline phosphatase prior to ligation to avoid re-circularization of the vector. Constructs were verified by Sanger sequencing (MOBIX lab, McMaster, Hamilton, ON).

### Mutant generation by allelic exchange

Allelic exchange was used to remove or alter specific genes [98]. pEX18Gm suicide plasmid derivatives (see Cloning procedures and S1 Table) were used to create all mutants in this work. After heat-shock transformation into *E. coli* SM10 cells, pEX18Gm constructs were conjugated into corresponding PA14 or PAO1 parent strains. Cells were then transferred to *Pseudomonas* isolation agar (PIA) Gm100 plates and incubated for 18 h at 37°C, to select for integration of pEX18Gm derivatives into the chromosome. Colonies were streaked onto LB/sucrose and incubated at 30°C for 18 h to select against merodiploids. Resultant colonies were patched onto LB and LB Gm30 to identify gentamicin-sensitive colonies. Regions flanking the desired mutations were amplified and sequenced to confirm success.

### Twitching motility assays

Twitching motility assays were performed as previously described [99], with the following modifications. Individual colonies were stab-inoculated in triplicate into 1% agar LB solidified in plasma-treated tissue culture-grade plates (Thermo Fisher) and incubated at 30°C for 48 h. Agar was carefully removed and plates were stained with 1% crystal violet for 5 min. Unbound dye was removed by rinsing with water, then stained twitching areas were measured using ImageJ. Twitching zones were normalized to WT (100%).

### Biofilm assays

Biofilm assays were performed as previously described, with modifications [100]. *P. aeruginosa* cultures were grown for 16 h at 37°C, diluted 1:200 in fresh LB, and grown to OD<sub>600</sub> ~0.1. Cultures were then diluted 1:500 in liquid SK media (50 mM NaCl, 0.35% peptone, 1 mM CaCl<sub>2</sub>, 1 mM MgSO<sub>4</sub>, 5 µg/ml cholesterol in EtOH, 20 mM KH<sub>2</sub>PO<sub>4</sub>, and 5 mM K<sub>2</sub>HPO<sub>4</sub>), then 96-well plates were inoculated with 150 µl each strain, in triplicate. Sterility controls (liquid SK media) were included throughout the plate to check for contamination. Plates were covered with peg lids (Nunc) then wrapped in parafilm and incubated at 37°C for 24 h, shaken at 200 rpm. After incubation, the OD<sub>600</sub> of the plate was measured to check for uniform growth and lack of contamination. Peg lids were washed for 10 min in 200 µl/well 1X phosphate-buffered saline (PBS), then stained with 200 µl/well 0.1% (w/v) crystal violet for 15 min. Unbound crystal violet was removed by washing lids in 70 ml distilled water 5 times at 10 min intervals. Crystal violet was solubilized from lids in 200 µl/well 33.3% acetic acid, then the absorbance at 600 nm was measured. Optical density and absorbance at 600 nm were plotted for growth and biofilm formation, respectively, then analyzed by one-way ANOVA followed by Dunnett post-test to compare each mutant to the WT control,  $p = 0.05$ . Error bars indicate standard error of the mean. Representative wells of acetic acid-solubilized crystal violet were imaged.

### *Caenorhabditis elegans* slow killing assay

SK assays were performed as described previously [101]. SK plates (0.35% peptone, 50 mM NaCl, 2% agar, 1 mM CaCl<sub>2</sub>, 5 µg/ml cholesterol, 1 mM MgSO<sub>4</sub>, 20 mM KH<sub>2</sub>PO<sub>4</sub>, 5 mM

$K_2HPO_4$ , 100  $\mu$ M FUdR) were seeded with 100  $\mu$ l of an overnight culture and incubated overnight at 37°C. The following day, plates were enriched with 1 ml of an overnight culture concentrated to 100  $\mu$ l. Synchronized L4 worms were collected from *E. coli* OP50 plates, washed twice in M9 buffer, and then >50 worms were seeded onto each bacterial lawn on individual SK plates. SK plates were incubated at 25°C and scored for dead worms every 24 h. Worms were considered dead when they did not respond to touch, and were removed from the plate. OP50 was included as a negative control for virulence. Percent survival was plotted as a function of time. Survival curves were plotted on GraphPad Prism 5.00 for Windows, then compared using the Gehan-Breslow-Wilcoxon test,  $p = 0.05$ . Given that larvae were synchronized at 20°C then transferred at L4 to 25°C for the duration of the assay, worms were at risk of death due to senescence, rather than direct killing by *P. aeruginosa*, before day 10 [46]. Therefore, the Gehan-Breslow-Wilcoxon test, which gives weight to earlier timepoints, was used in favour of the standard log-rank test (notably, all reported differences were also significant by the standard log-rank test). To correct for multiple analyses, the critical  $p$ -value of 0.05 was divided by the number of pairwise comparisons made within an individual trial, as per the Bonferroni method [102]. Each assay was performed at least 3 times, and differences were only considered significant if they were reproducible in the majority of trials. Representative trials are shown; all replicates can be viewed in the Supplemental Material (S1 File).

### Luminescent reporter assay

Luminescent reporter assays were performed as previously described, with minor modifications [60]. Various strains harbouring the pMS402-*PfimU* or pMS402-*PcdrA* plasmids, encoding the luciferase genes under control of the *fimU* or *cdrA* promoters, respectively, were grown for 16 h at 37°C in LB Kan150, then diluted 1:50 in fresh liquid SK media with Kan150, in addition to Gm30 and 0.05% L-arabinose where appropriate. Subsequently, 100  $\mu$ l of each culture was added to white-walled, clear-bottom 96-well plates (Corning) in triplicate, and incubated with shaking at 37°C in a Synergy 4 microtiter plate reader (BioTek). Luminescence readings were taken every 15 min for 5 h, and normalized to growth ( $OD_{600}$ ) at each time point. Readings that exceeded the limit of detection (>4 000 000 luminescence units) were discarded. At least 3 individual trials were performed. Error bars indicate standard error of the mean.

### Bacterial two-hybrid $\beta$ -galactosidase activity assay

To test for interactions between FimS and AlgR or individual pilins, BACTH assays were performed as previously described [103]. pUT18C and pKT25 derivatives, encoding the T18 and T25 domains of the *Bordetella pertussis* CyaA adenylate cyclase fused to the N-terminus of FimS, AlgR, PilA, FimU, PilV, PilW, PilX, or PilE [24, 60, 104], were co-transformed into *E. coli* BTH 101 to screen for pairwise interactions. Single colonies were inoculated in 5 ml LB Amp100 Kan50 and grown overnight. The following day, 100  $\mu$ l was inoculated into 5 ml fresh media and grown to  $OD_{600} = 0.6$ , then 5  $\mu$ l was spotted onto MacConkey plates (1.5% agar, 100  $\mu$ g/ml ampicillin, 50  $\mu$ g/ml kanamycin, 1% (w/v) maltose, 0.5 mM isopropyl b-D-thiogalactopyranoside) (Difco) or LB Amp100 Kan50 plates supplemented with 100  $\mu$ l of 20 mg/ml X-gal. Plates were incubated at 30°C for 24 h. An interaction was considered positive when colonies appeared pink or blue on MacConkey and LB + X-gal plates, respectively. BTH 101 expressing pUT18C-*fimS* and pKT25-*fimS* was used as a positive control [49]. Negative controls included BTH 101 expressing the empty vectors pUT18C and pKT25, and BTH 101 expressing pKT25-*fimS* and pUT18C (empty vector).



## Supporting information

**S1 Fig. Twitching motility and virulence of *pilW*, *pilX*, and *pilY1* mutants can be complemented *in trans*.** (A) Twitching motility assays for complemented PA14 *pilW*, *pilX*, and *pilY1* mutants. Colonies were stab-inoculated into 1% agar LB plates, in triplicate. Plates were stained with crystal violet after 48 h at 30°C. Complementation of PA14 *pilW*, *pilX*, and *pilY1* mutants with pBADGr-*pilW*, pBADGr-*pilX*, or pBADGr-*pilY1*, respectively, led to increased TM relative to complementation with pBADGr alone. Numbers indicate percent twitching area relative to WT, n = 3. (B) SK assays for complemented PA14 *pilW*, *pilX*, and *pilY1* mutants. Complementation of *pilW*, *pilX*, and *pilY1* mutants with pBADGr-*pilW*, pBADGr-*pilX*, or pBADGr-*pilY1*, respectively, restored virulence to near-WT levels. Asterisks indicate strains that were less virulent than PA14 + pBADGr by Gehan-Breslow-Wilcoxon test at p = 0.05 (p = 0.00833 with a Bonferroni correction), n = 3. Individual graphs represent separate trials. (TIF)

**S2 Fig. PA14 and PAO1 produce low levels of biofilm in liquid slow killing media.** Biofilm assays for (A) PA14 and (B) PAO1 *pilA*, *fimU*, *pilV*, *pilW*, *pilX*, *pilY1*, and *pilE* mutants. Very little biofilm formation was detectable in liquid SK media for any strains. There were no differences in biofilm formation as determined by one-way ANOVA followed by Dunnett post-test relative to WT at p = 0.05, n = 3. (TIF)

**S3 Fig. SadC is not required for virulence in PA14 or PAO1.** SK assays for (A) PA14 and (B) PAO1 *sadC* mutants. Loss of *sadC* had no impact on pathogenicity relative to each respective WT strain, as measured by Gehan-Breslow-Wilcoxon test at p = 0.05 (p = 0.025 with a Bonferroni correction), n = 3. (TIF)

**S4 Fig. *pilV*, *pilW*, *pilX*, and *pilY1* mutants cannot be cross-complemented for *fimU* promoter activity.** (A) *fimU* promoter activity of *pilV*, *pilW*, *pilX*, and *pilY1* mutants complemented with the respective gene *in trans*. The high luminescence of each mutant was restored to WT level when *pilV*, *pilW*, *pilX*, and *pilY1* were complemented with PilV, PilW, PilX, and PilY1, respectively. (B) *fimU* promoter activity of a *pilY1* mutant expressing each MP *in trans*. Expression of FimU, PilV, PilW, PilX, or PilE in the *pilY1* background had no impact on *fimU* promoter activity relative to the *pilY1* + empty vector control. (C) *fimU* promoter activity of *pilW* and *pilX* mutants overexpressing PilY1. Overexpression of PilY1 had no impact on *fimU* promoter activity in *pilW* and *pilX* backgrounds relative to the respective vector-only controls. Assays in (A), (B), and (C) were carried out in the presence of 0.05% L-arabinose to induce expression of the pBADGr promoter, n = 3. (TIF)

**S5 Fig. PilD is not required for PilWXY1-mediated modulation of FimS-AlgR activity.** (A) Twitching motility assays for PA14 *pilA* and *pilD* mutants. Loss of *pilD* resulted in loss of twitching motility. Numbers indicate percent twitching area relative to WT, n = 3. (B) *fimU* promoter activity of a *pilD* mutant compared to PA14, *pilA*, and *pilY1*. Loss of *pilD* had no impact on *fimU* promoter activity relative to WT, n = 3. (C) SK assays for PA14, *pilA*, *pilY1*, and *pilD* mutants. A *pilD* mutant had equivalent virulence to a *pilA* mutant; less pathogenic than WT but more pathogenic than a *pilY1* mutants. Asterisks represent strains that were significantly different from the *pilA* mutant by Gehan-Breslow-Wilcoxon test at p = 0.05 (p = 0.0125 with a Bonferroni correction), n = 3. (TIF)

**S6 Fig. Phosphorylation of AlgR is required for optimal twitching motility.** (A) Twitching motility assays for PA14 *pilA*, *fimS*, *algR*, *algR*<sub>D54A</sub>, and *algR*<sub>D54E</sub> mutants. Twitching motility was abolished in *pilA*, *algR*, and *algR*<sub>D54A</sub> mutants, and fully retained in the *algR*<sub>D54E</sub> mutant. A *fimS* mutant twitched to ~50% WT levels. (B) Twitching motility assays for PA14 *algR* complemented with AlgR or AlgR<sub>D54A</sub>. An *algR* mutant was fully complemented by AlgR with and without induction by 0.05% L-arabinose. The AlgR<sub>D54A</sub> variant supported twitching motility in the *algR* mutant background in the presence of 0.05% L-arabinose, to ~25% WT levels. In (A) and (B), numbers indicate percent twitching area relative to WT, n = 3. (TIF)

**S1 Table. Bacterial strains and plasmids used in this study.**  
(DOCX)

**S2 Table. Primers used in this study.** Restriction sites are underlined.  
(DOCX)

**S1 File. Replicates for slow killing assays.** Three independent experiments for Figs 1A, 1B, 3B, 5A, 5B, 6A, 7A–7C and 8, and S1B, S3A, S3B and S5C Figs.  
(PDF)

## Author Contributions

**Conceptualization:** Victoria A. Marko, Lori L. Burrows.

**Data curation:** Victoria A. Marko, Sara L. N. Kilmury.

**Formal analysis:** Victoria A. Marko, Sara L. N. Kilmury.

**Funding acquisition:** Lori L. Burrows.

**Investigation:** Victoria A. Marko.

**Methodology:** Victoria A. Marko, Sara L. N. Kilmury, Lesley T. MacNeil.

**Resources:** Lori L. Burrows.

**Supervision:** Lesley T. MacNeil, Lori L. Burrows.

**Writing – original draft:** Victoria A. Marko, Sara L. N. Kilmury, Lesley T. MacNeil, Lori L. Burrows.

**Writing – review & editing:** Victoria A. Marko, Lesley T. MacNeil, Lori L. Burrows.

## References

1. Global priority list of antibiotic-resistant bacteria to guide research, discovery, and development of new antibiotics [Internet]. World Health Organization 2017. Available from: [http://www.who.int/medicines/publications/WHO-PPL-Short\\_Summary\\_25Feb-ET\\_NM\\_WHO.pdf](http://www.who.int/medicines/publications/WHO-PPL-Short_Summary_25Feb-ET_NM_WHO.pdf)
2. Burrows LL. *Pseudomonas aeruginosa* twitching motility: type IV pili in action. Annu Rev Microbiol. 2012; 66:493–520. <https://doi.org/10.1146/annurev-micro-092611-150055> PMID: 22746331
3. Hospenthal MK, Costa TRD, Waksman G. A comprehensive guide to pilus biogenesis in Gram-negative bacteria. Nat Rev Micro. 2017; 15(6):365–79. <https://doi.org/10.1038/nrmicro.2017.40> PMID: 28496159
4. Berry J-L, Pelicic V. Exceptionally widespread nanomachines composed of type IV pilins: the prokaryotic Swiss Army knives. FEMS Microbiol Rev. 2015; 39(1):1–21.
5. Mahenthiralingam E, Campbell ME, Speert DP. Nonmotility and phagocytic resistance of *Pseudomonas aeruginosa* isolates from chronically colonized patients with cystic fibrosis. Infect Immun. 1994; 62(2):596–605. PMC186146. PMID: 8300217

6. Chi E, Mehl T, Nunn D, Lory S. Interaction of *Pseudomonas aeruginosa* with A549 pneumocyte cells. *Infect Immun*. 1991; 59(3):822–8. PMC258333. PMID: [1671777](#)
7. Doig P, Todd T, Sastry PA, Lee KK, Hodges RS, Paranchych W, et al. Role of pili in adhesion of *Pseudomonas aeruginosa* to human respiratory epithelial cells. *Infect Immun*. 1988; 56(6):1641–6. Epub 1988/06/01. PMID: [2897336](#); PubMed Central PMCID: PMCPMC259449.
8. Pier GB, Meluleni G, Neuger E. A murine model of chronic mucosal colonization by *Pseudomonas aeruginosa*. *Infect Immun*. 1992; 60(11):4768–76. PMC258230. PMID: [1398987](#)
9. Saiman L, Ishimoto K, Lory S, Prince A. The effect of piliation and exoproduct expression on the adherence of *Pseudomonas aeruginosa* to respiratory epithelial monolayers. *J Infect Dis*. 1990; 161(3):541–8. Epub 1990/03/01. PMID: [1968936](#).
10. Zoutman DE, Hulbert WC, Pasloske BL, Joffe AM, Volpel K, Trebilcock MK, et al. The role of polar pili in the adherence of *Pseudomonas aeruginosa* to injured canine tracheal cells: a semiquantitative morphologic study. *Scanning Microsc*. 1991; 5(1):109–26. Epub 1991/03/01. PMID: [1675811](#).
11. Comolli JC, Hauser AR, Waite L, Whitchurch CB, Mattick JS, Engel JN. *Pseudomonas aeruginosa* gene products PilT and PilU are required for cytotoxicity in vitro and virulence in a mouse model of acute pneumonia. *Infect Immun*. 1999; 67(7):3625–30. PMC116553. PMID: [10377148](#)
12. Alm RA, Hallinan JP, Watson AA, Mattick JS. Fimbrial biogenesis genes of *Pseudomonas aeruginosa*: *pilW* and *pilX* increase the similarity of type 4 fimbriae to the GSP protein-secretion systems and *pilY1* encodes a gonococcal PilC homologue. *Mol Microbiol*. 1996; 22(1):161–73. Epub 1996/10/01. PMID: [8899718](#).
13. Alm RA, Mattick JS. Identification of a gene, *pilV*, required for type 4 fimbrial biogenesis in *Pseudomonas aeruginosa*, whose product possesses a pre-pilin-like leader sequence. *Mol Microbiol*. 1995; 16(3):485–96. Epub 1995/05/01. PMID: [7565109](#).
14. Alm RA, Mattick JS. Identification of two genes with prepilin-like leader sequences involved in type 4 fimbrial biogenesis in *Pseudomonas aeruginosa*. *J Bacteriol*. 1996; 178(13):3809–17. Epub 1996/07/01. PMID: [8682785](#); PubMed Central PMCID: PMCPMC232641.
15. Russell MA, Darzins A. The *pilE* gene product of *Pseudomonas aeruginosa*, required for pilus biogenesis, shares amino acid sequence identity with the N-termini of type 4 prepilin proteins. *Mol Microbiol*. 1994; 13(6):973–85. Epub 1994/09/01. PMID: [7854130](#).
16. Hobbs M, Collie ES, Free PD, Livingston SP, Mattick JS. PilS and PilR, a two-component transcriptional regulatory system controlling expression of type 4 fimbriae in *Pseudomonas aeruginosa*. *Mol Microbiol*. 1993; 7(5):669–82. Epub 1993/03/01. PMID: [8097014](#).
17. Belete B, Lu H, Wozniak DJ. *Pseudomonas aeruginosa* AlgR regulates type IV pilus biosynthesis by activating transcription of the *fimU-pilVWXY1Y2E* operon. *J Bacteriol*. 2008; 190(6):2023–30. <https://doi.org/10.1128/JB.01623-07> PMID: [18178737](#)
18. Whitchurch CB, Alm RA, Mattick JS. The alginate regulator AlgR and an associated sensor FimS are required for twitching motility in *Pseudomonas aeruginosa*. *Proc Natl Acad Sci U S A*. 1996; 93(18):9839–43. Epub 1996/09/03. PMID: [8790418](#); PubMed Central PMCID: PMCPMC38516.
19. Okkotsu Y, Little AS, Schurr MJ. The *Pseudomonas aeruginosa* AlgZR two-component system coordinates multiple phenotypes. *Front Cell Infect Microbiol*. 2014; 4:82. doi: [10.3389/fcimb.2014.00082](#). PMC4064291. PMID: [24999454](#)
20. Wolfgang MC, Lee VT, Gilmore ME, Lory S. Coordinate regulation of bacterial virulence genes by a novel adenylate cyclase-dependent signaling pathway. *Dev Cell*. 2003; 4(2):253–63. [https://doi.org/10.1016/S1534-5807\(03\)00019-4](https://doi.org/10.1016/S1534-5807(03)00019-4) PMID: [12586068](#)
21. Yu H, Mudd M, Boucher JC, Schurr MJ, Deretic V. Identification of the *algZ* gene upstream of the response regulator *algR* and its participation in control of alginate production in *Pseudomonas aeruginosa*. *J Bacteriol*. 1997; 179(1):187–93. Epub 1997/01/01. PMID: [8981997](#); PubMed Central PMCID: PMCPMC178678.
22. Strom MS, Bergman P, Lory S. Identification of active-site cysteines in the conserved domain of PilD, the bifunctional type IV pilin leader peptidase/N-methyltransferase of *Pseudomonas aeruginosa*. *J Biol Chem*. 1993; 268(21):15788–94. Epub 1993/07/25. PMID: [8340405](#).
23. Giltner CL, Habash M, Burrows LL. *Pseudomonas aeruginosa* minor pilins are incorporated into type IV pili. *J Mol Biol*. 2010; 398(3):444–61. Epub 2010/03/27. <https://doi.org/10.1016/j.jmb.2010.03.028> PMID: [20338182](#).
24. Nguyen Y, Sugiman-Marangos S, Harvey H, Bell SD, Charlton CL, Junop MS, et al. *Pseudomonas aeruginosa* minor pilins prime type IVa pilus assembly and promote surface display of the PilY1 adhesin. *J Biol Chem*. 2015; 290(1):601–11. doi: [10.1074/jbc.M114.616904](#). PMC4281761. PMID: [25389296](#)

25. Sauvonnet N, Vignon G, Pugsley AP, Gounon P. Pilus formation and protein secretion by the same machinery in *Escherichia coli*. *EMBO J*. 2000; 19(10):2221–8. doi: [10.1093/emboj/19.10.2221](https://doi.org/10.1093/emboj/19.10.2221). PMC384360. PMID: [10811613](https://pubmed.ncbi.nlm.nih.gov/10811613/)
26. McCallum M, Tammam S, Khan A, Burrows LL, Howell PL. The molecular mechanism of the type IVa pilus motors. *Nat Commun*. 2017; 8:15091. doi: [10.1038/ncomms15091](https://doi.org/10.1038/ncomms15091). PMC5424180. PMID: [28474682](https://pubmed.ncbi.nlm.nih.gov/28474682/)
27. Ramer SW, Schoolnik GK, Wu C-Y, Hwang J, Schmidt SA, Bieber D. The type IV pilus assembly complex: biogenic interactions among the bundle-forming pilus proteins of enteropathogenic *Escherichia coli*. *J Bacteriol*. 2002; 184(13):3457–65. doi: [10.1128/JB.184.13.3457-3465.2002](https://doi.org/10.1128/JB.184.13.3457-3465.2002). PMC135125. PMID: [12057939](https://pubmed.ncbi.nlm.nih.gov/12057939/)
28. Winther-Larsen HC, Wolfgang M, Dunham S, Van Putten JPM, Dorward D, Løvold C, et al. A conserved set of pilin-like molecules controls type IV pilus dynamics and organelle-associated functions in *Neisseria gonorrhoeae*. *Mol Microbiol*. 2005; 56(4):903–17. <https://doi.org/10.1111/j.1365-2958.2005.04591.x> PMID: [15853879](https://pubmed.ncbi.nlm.nih.gov/15853879/)
29. Carbonnelle E, Helaine S, Nassif X, Pelicic V. A systematic genetic analysis in *Neisseria meningitidis* defines the Pil proteins required for assembly, functionality, stabilization and export of type IV pili. *Mol Microbiol*. 2006; 61(6):1510–22. <https://doi.org/10.1111/j.1365-2958.2006.05341.x> PMID: [16968224](https://pubmed.ncbi.nlm.nih.gov/16968224/)
30. Chang Y-W, Rettberg LA, Treuner-Lange A, Iwasa J, Søgaard-Andersen L, Jensen GJ. Architecture of the type IVa pilus machine. *Science*. 2016; 351(6278).
31. Heiniger RW, Winther-Larsen HC, Pickles RJ, Koomey M, Wolfgang MC. Infection of human mucosal tissue by *Pseudomonas aeruginosa* requires sequential and mutually dependent virulence factors and a novel pilus-associated adhesin. *Cell Microbiol*. 2010; 12(8):1158–73. <https://doi.org/10.1111/j.1462-5822.2010.01461.x> PMID: [20331639](https://pubmed.ncbi.nlm.nih.gov/20331639/)
32. Wolfgang M, Park H-S, Hayes SF, van Putten JPM, Koomey M. Suppression of an absolute defect in type IV pilus biogenesis by loss-of-function mutations in *pilT*, a twitching motility gene in *Neisseria gonorrhoeae*. *Proc Natl Acad Sci U S A*. 1998; 95(25):14973–8. PMC24560. PMID: [9844000](https://pubmed.ncbi.nlm.nih.gov/9844000/)
33. Bohn Y-ST, Brandes G, Rakhimova E, Horatzek S, Salunkhe P, Munder A, et al. Multiple roles of *Pseudomonas aeruginosa* TBCF10839 PilY1 in motility, transport and infection. *Mol Microbiol*. 2009; 71(3):730–47. <https://doi.org/10.1111/j.1365-2958.2008.06559.x> PMID: [19054330](https://pubmed.ncbi.nlm.nih.gov/19054330/)
34. Garvis S, Munder A, Ball G, de Bentzmann S, Wiehlmann L, Ewbank JJ, et al. *Caenorhabditis elegans* semi-automated liquid screen reveals a specialized role for the chemotaxis gene *cheB2* in *Pseudomonas aeruginosa* virulence. *PLOS Pathog*. 2009; 5(8):e1000540. doi: [10.1371/journal.ppat.1000540](https://doi.org/10.1371/journal.ppat.1000540). PMC2714965. PMID: [19662168](https://pubmed.ncbi.nlm.nih.gov/19662168/)
35. Feinbaum RL, Urbach JM, Liberati NT, Djonovic S, Adonizio A, Carvunis A-R, et al. Genome-wide identification of *Pseudomonas aeruginosa* virulence-related genes using a *Caenorhabditis elegans* infection model. *PLOS Pathog*. 2012; 8(7):e1002813. <https://doi.org/10.1371/journal.ppat.1002813> PMID: [22911607](https://pubmed.ncbi.nlm.nih.gov/22911607/)
36. Lewenza S, Charron-Mazenod L, Giroux L, Zamponi AD. Feeding behaviour of *Caenorhabditis elegans* is an indicator of *Pseudomonas aeruginosa* PAO1 virulence. *PeerJ*. 2014; 2:e521. doi: [10.7717/peerj.521](https://doi.org/10.7717/peerj.521). PMC4137669. PMID: [25165631](https://pubmed.ncbi.nlm.nih.gov/25165631/)
37. Jansen G, Crummenerl LL, Gilbert F, Mohr T, Pfefferkorn R, Thänert R, et al. Evolutionary transition from pathogenicity to commensalism: global regulator mutations mediate fitness gains through virulence attenuation. *Mol Biol Evol*. 2015; 32(11):2883–96. <https://doi.org/10.1093/molbev/msv160> PMID: [26199376](https://pubmed.ncbi.nlm.nih.gov/26199376/)
38. Siryaporn A, Kuchma SL, O'Toole GA, Gitai Z. Surface attachment induces *Pseudomonas aeruginosa* virulence. *Proc Natl Acad Sci U S A*. 2014; 111(47):16860–5. <https://doi.org/10.1073/pnas.1415712111> PMID: [25385640](https://pubmed.ncbi.nlm.nih.gov/25385640/)
39. Kuchma SL, Ballok AE, Merritt JH, Hammond JH, Lu W, Rabinowitz JD, et al. Cyclic-di-GMP-mediated repression of swarming motility by *Pseudomonas aeruginosa*: the *pilY1* gene and its impact on surface-associated behaviors. *J Bacteriol*. 2010; 192(12):2950–64. <https://doi.org/10.1128/JB.01642-09> PMID: [20233936](https://pubmed.ncbi.nlm.nih.gov/20233936/)
40. Luo Y, Zhao K, Baker AE, Kuchma SL, Coggan KA, Wolfgang MC, et al. A hierarchical cascade of second messengers regulates *Pseudomonas aeruginosa* surface behaviors. *mBio*. 2015; 6(1). <https://doi.org/10.1128/mBio.02456-14> PMID: [25626906](https://pubmed.ncbi.nlm.nih.gov/25626906/)
41. Persat A, Inclan YF, Engel JN, Stone HA, Gitai Z. Type IV pili mechanochemically regulate virulence factors in *Pseudomonas aeruginosa*. *Proc Natl Acad Sci U S A*. 2015; 112(24):7563–8. Epub 2015/06/05. <https://doi.org/10.1073/pnas.1502025112> PMID: [26041805](https://pubmed.ncbi.nlm.nih.gov/26041805/); PubMed Central PMCID: PMC4475988.
42. Merritt JH, Brothers KM, Kuchma SL, O'Toole GA. SadC reciprocally influences biofilm formation and swarming motility via modulation of exopolysaccharide production and flagellar function. *J Bacteriol*.

- 2007; 189(22):8154–64. Epub 2007/06/26. <https://doi.org/10.1128/JB.00585-07> PMID: 17586642; PubMed Central PMCID: PMCPMC2168701.
43. Kuchma SL, Griffin EF, O'Toole GA. Minor pilins of the type IV pilus system participate in the negative regulation of swarming motility. *J Bacteriol.* 2012; 194(19):5388–403. doi: [10.1128/JB.00899-12](https://doi.org/10.1128/JB.00899-12). PMC3457191. PMID: 22865844
  44. Rodesney CA, Roman B, Dhamani N, Cooley BJ, Katira P, Touhami A, et al. Mechanosensing of shear by *Pseudomonas aeruginosa* leads to increased levels of the cyclic-di-GMP signal initiating biofilm development. *Proc Natl Acad Sci U S A.* 2017; 114(23):5906–11. <https://doi.org/10.1073/pnas.1703255114> PMID: 28533383
  45. Gallagher LA, Manoil C. *Pseudomonas aeruginosa* PAO1 kills *Caenorhabditis elegans* by cyanide poisoning. *J Bacteriol.* 2001; 183(21):6207–14. doi: [10.1128/JB.183.21.6207-6214.2001](https://doi.org/10.1128/JB.183.21.6207-6214.2001). PMC100099. PMID: 11591663
  46. Zhang B, Xiao R, Ronan EA, He Y, Hsu A-L, Liu J, et al. Environmental temperature differentially modulates *C. elegans* longevity through a thermosensitive TRP channel. *Cell Rep.* 2015; 11(9):1414–24. doi: [10.1016/j.celrep.2015.04.066](https://doi.org/10.1016/j.celrep.2015.04.066). PMC4758836. PMID: 26027928
  47. Machin D, Cheung YB, Parmar MKB. Comparison of survival curves. *Survival analysis: a practical approach.* 2nd ed: John Wiley & Sons, Ltd; 2006. p. 51–90.
  48. Giltner CL, Rana N, Lunardo MN, Hussain AQ, Burrows LL. Evolutionary and functional diversity of the *Pseudomonas type IVa* pilin island. *Environ Microbiol.* 2011; 13(1):250–64. <https://doi.org/10.1111/j.1462-2920.2010.02327.x> PMID: 20738375
  49. Rytbke MT, Borlee BR, Murakami K, Irie Y, Hentzer M, Nielsen TE, et al. Fluorescence-based reporter for gauging cyclic di-GMP levels in *Pseudomonas aeruginosa*. *Appl Environ Microbiol.* 2012; 78(15):5060–9. doi: [10.1128/AEM.00414-12](https://doi.org/10.1128/AEM.00414-12). PMC3416407. PMID: 22582064
  50. Moscoso JA, Jaeger T, Valentini M, Hui K, Jenal U, Filloux A. The diguanylate cyclase SadC is a central player in Gac/Rsm-mediated biofilm formation in *Pseudomonas aeruginosa*. *J Bacteriol.* 2014; 196(23):4081–8. Epub 2014/09/17. <https://doi.org/10.1128/JB.01850-14> PMID: 25225264; PubMed Central PMCID: PMCPMC4248864.
  51. Bouffartigues E, Moscoso JA, Duchesne R, Rosay T, Fito-Boncompte L, Gicquel G, et al. The absence of the *Pseudomonas aeruginosa* OprF protein leads to increased biofilm formation through variation in c-di-GMP level. *Front Microbiol.* 2015; 6:630. doi: [10.3389/fmicb.2015.00630](https://doi.org/10.3389/fmicb.2015.00630). PMC4477172. PMID: 26157434
  52. Li K, Yang G, Debru AB, Li P, Zong L, Li P, et al. SuhB regulates the motile-sessile switch in *Pseudomonas aeruginosa* through the Gac/Rsm pathway and c-di-GMP signaling. *Front Microbiol.* 2017; 8(1045). <https://doi.org/10.3389/fmicb.2017.01045> PMID: 28642753
  53. Nair HAS, Periasamy S, Yang L, Kjelleberg S, Rice SA. Real time, spatial, and temporal mapping of the distribution of c-di-GMP during biofilm development. *J Biol Chem.* 2017; 292(2):477–87. doi: [10.1074/jbc.M116.746743](https://doi.org/10.1074/jbc.M116.746743). PMC5241725. PMID: 27899451
  54. Valentini M, Laventie B-J, Moscoso J, Jenal U, Filloux A. The diguanylate cyclase HsbD intersects with the HptB regulatory cascade to control *Pseudomonas aeruginosa* biofilm and motility. *PLoS Genet.* 2016; 12(10):e1006354. <https://doi.org/10.1371/journal.pgen.1006354> PMID: 27792789
  55. Kong W, Zhao J, Kang H, Zhu M, Zhou T, Deng X, et al. ChIP-seq reveals the global regulator AlgR mediating cyclic di-GMP synthesis in *Pseudomonas aeruginosa*. *Nucleic Acids Res.* 2015; 43(17):8268–82. doi: [10.1093/nar/gkv747](https://doi.org/10.1093/nar/gkv747). PMC4787818. PMID: 26206672
  56. Morici LA, Carterson AJ, Wagner VE, Frisk A, Schurr JR, Honer zu Bentrup K, et al. *Pseudomonas aeruginosa* AlgR represses the Rhl quorum-sensing system in a biofilm-specific manner. *J Bacteriol.* 2007; 189(21):7752–64. Epub 2007/09/04. <https://doi.org/10.1128/JB.01797-06> PMID: 17766417; PubMed Central PMCID: PMCPMC2168728.
  57. Zhang L, Fritsch M, Hammond L, Landreville R, Slatculescu C, Colavita A, et al. Identification of genes involved in *Pseudomonas aeruginosa* biofilm-specific resistance to antibiotics. *PLOS ONE.* 2013; 8(4):e61625. <https://doi.org/10.1371/journal.pone.0061625> PMID: 23637868
  58. van Tilburg Bernardes E, Charron-Mazenod L, Reading DJ, Reckseidler-Zenteno SL, Lewenza S. Exopolysaccharide-repressing small molecules with antibiofilm and antivirulence activity against *Pseudomonas aeruginosa*. *Antimicrob Agents Chemother.* 2017. <https://doi.org/10.1128/aac.01997-16> PMID: 28223377
  59. Irazoqui JE, Troemel ER, Feinbaum RL, Luhachack LG, Cezairliyan BO, Ausubel FM. Distinct pathogenesis and host responses during infection of *C. elegans* by *P. aeruginosa* and *S. aureus*. *PLOS Pathog.* 2010; 6:e1000982. Epub 2010/07/10. <https://doi.org/10.1371/journal.ppat.1000982> PMID: 20617181; PubMed Central PMCID: PMCPMC2895663.



60. Kilmury SLN, Burrows LL. Type IV pilins regulate their own expression via direct intramembrane interactions with the sensor kinase PilS. *Proc Natl Acad Sci U S A*. 2016; 113(21):6017–22. <https://doi.org/10.1073/pnas.1512947113> PMID: 27162347
61. Strom MS, Lory S. Amino acid substitutions in pilin of *Pseudomonas aeruginosa*. Effect on leader peptide cleavage, amino-terminal methylation, and pilus assembly. *J Biol Chem*. 1991; 266(3):1656–64. Epub 1991/01/25. PMID: 1671038.
62. Okkotsu Y, Tiekou P, Fitzsimmons LF, Churchill ME, Schurr MJ. *Pseudomonas aeruginosa* AlgR phosphorylation modulates rhamnolipid production and motility. *J Bacteriol*. 2013; 195(24):5499–515. Epub 2013/10/08. <https://doi.org/10.1128/JB.00726-13> PMID: 24097945; PubMed Central PMCID: PMC3889618.
63. Whitchurch CB, Erova TE, Emery JA, Sargent JL, Harris JM, Semmler AB, et al. Phosphorylation of the *Pseudomonas aeruginosa* response regulator AlgR is essential for type IV fimbria-mediated twitching motility. *J Bacteriol*. 2002; 184(16):4544–54. Epub 2002/07/27. <https://doi.org/10.1128/JB.184.16.4544-4554.2002> PMID: 12142425; PubMed Central PMCID: PMC3889618.
64. Deretic V, Leveau JH, Mohr CD, Hibler NS. In vitro phosphorylation of AlgR, a regulator of mucoidy in *Pseudomonas aeruginosa*, by a histidine protein kinase and effects of small phospho-donor molecules. *Mol Microbiol*. 1992; 6(19):2761–7. Epub 1992/10/01. PMID: 1435255.
65. Lizewski SE, Lundberg DS, Schurr MJ. The transcriptional regulator AlgR is essential for *Pseudomonas aeruginosa* pathogenesis. *Infect Immun*. 2002; 70(11):6083–93. doi: 10.1128/IAI.70.11.6083-6093.2002. PMC130412. PMID: 12379685
66. Stacey SD, Williams DA, Pritchett CL. The *Pseudomonas aeruginosa* two-component regulator AlgR directly activates *rsmA* expression in a phosphorylation independent manner. *J Bacteriol*. 2017. <https://doi.org/10.1128/jb.00048-17> PMID: 28320883
67. Ma S, Selvaraj U, Ohman DE, Quarless R, Hassett DJ, Wozniak DJ. Phosphorylation-independent activity of the response regulators AlgB and AlgR in promoting alginate biosynthesis in mucoid *Pseudomonas aeruginosa*. *J Bacteriol*. 1998; 180(4):956–68. Epub 1998/02/24. PMID: 9473053; PubMed Central PMCID: PMC3889618.
68. Pritchett CL, Little AS, Okkotsu Y, Frisk A, Cody WL, Covey CR, et al. Expression analysis of the *Pseudomonas aeruginosa* AlgZR two-component regulatory system. *J Bacteriol*. 2015; 197(4):736–48. doi: 10.1128/JB.02290-14. PMC4334192. PMID: 25488298
69. Wozniak DJ, Ohman DE. Transcriptional analysis of the *Pseudomonas aeruginosa* genes *algR*, *algB*, and *algD* reveals a hierarchy of alginate gene expression which is modulated by *algT*. *J Bacteriol*. 1994; 176(19):6007–14. PMC196818. PMID: 7928961
70. Falcone M, Ferrara S, Rossi E, Johansen HK, Molin S, Bertoni G. The small RNA ErsA of *Pseudomonas aeruginosa* contributes to biofilm development and motility through post-transcriptional modulation of AmrZ. *Front Microbiol*. 2018; 9(238). <https://doi.org/10.3389/fmicb.2018.00238> PMID: 29497413
71. Yu H, Boucher JC, Hibler NS, Deretic V. Virulence properties of *Pseudomonas aeruginosa* lacking the extreme-stress sigma factor AlgU (sigmaE). *Infect Immun*. 1996; 64(7):2774–81. PMC174138. PMID: 8698507
72. Damron FH, Yu HD. *Pseudomonas aeruginosa* MucD regulates the alginate pathway through activation of MucA degradation via MucP proteolytic activity. *J Bacteriol*. 2011; 193(1):286–91. doi: 10.1128/JB.01132-10. PMC3019965. PMID: 21036998
73. Firoved AM, Deretic V. Microarray analysis of global gene expression in mucoid *Pseudomonas aeruginosa*. *J Bacteriol*. 2003; 185(3):1071–81. <https://doi.org/10.1128/JB.185.3.1071-1081.2003> PMID: 12533483
74. Jones AK, Fulcher NB, Balzer GJ, Urbanowski ML, Pritchett CL, Schurr MJ, et al. Activation of the *Pseudomonas aeruginosa* AlgU regulon through *mucA* mutation inhibits cyclic AMP/Vfr signaling. *J Bacteriol*. 2010; 192(21):5709–17. Epub 2010/09/08. <https://doi.org/10.1128/JB.00526-10> PMID: 20817772; PubMed Central PMCID: PMC3889618.
75. Yorgey P, Rahme LG, Tan MW, Ausubel FM. The roles of *mucD* and alginate in the virulence of *Pseudomonas aeruginosa* in plants, nematodes and mice. *Mol Microbiol*. 2001; 41(5):1063–76. <https://doi.org/10.1046/j.1365-2958.2001.02580.x> PMID: 1155287
76. Reddy KC, Hunter RC, Bhatla N, Newman DK, Kim DH. *Caenorhabditis elegans* NPR-1-mediated behaviors are suppressed in the presence of mucoid bacteria. *Proc Natl Acad Sci U S A*. 2011; 108(31):12887–92. doi: 10.1073/pnas.1108265108. PMC3150904. PMID: 21768378
77. Rau MH, Hansen SK, Johansen HK, Thomsen LE, Workman CT, Nielsen KF, et al. Early adaptive developments of *Pseudomonas aeruginosa* after the transition from life in the environment to persistent colonization in the airways of human cystic fibrosis hosts. *Environ Microbiol*. 2010; 12(6):1643–58. <https://doi.org/10.1111/j.1462-2920.2010.02211.x> PMID: 20406284

78. Korotkov KV, Hol WG. Structure of the GspK-GspI-GspJ complex from the enterotoxigenic *Escherichia coli* type 2 secretion system. *Nat Struct Mol Biol.* 2008; 15(5):462–8. Epub 2008/04/29. <https://doi.org/10.1038/nsmb.1426> PMID: 18438417.
79. Cisneros DA, Bond PJ, Pugsley AP, Campos M, Francetic O. Minor pseudopilin self-assembly primes type II secretion pseudopilus elongation. *EMBO J.* 2012; 31(4):1041–53. doi: [10.1038/emboj.2011.454](https://doi.org/10.1038/emboj.2011.454). PMC3280553. PMID: 22157749
80. Jenal U, Malone J. Mechanisms of cyclic-di-GMP signaling in bacteria. *Annu Rev Genet.* 2006; 40:385–407. <https://doi.org/10.1146/annurev.genet.40.110405.090423> PMID: 16895465
81. Taylor PK, Van Kessel ATM, Colavita A, Hancock REW, Mah T-F. A novel small RNA is important for biofilm formation and pathogenicity in *Pseudomonas aeruginosa*. *PLOS ONE.* 2017; 12(8):e0182582. doi: [10.1371/journal.pone.0182582](https://doi.org/10.1371/journal.pone.0182582). PMC5542712. PMID: 28771593
82. Darzins A, Chakrabarty AM. Cloning of genes controlling alginate biosynthesis from a mucoid cystic fibrosis isolate of *Pseudomonas aeruginosa*. *J Bacteriol.* 1984; 159(1):9–18. Epub 1984/07/01. PMID: 6330052; PubMed Central PMCID: PMC215585.
83. Kim D, Forst S. Genomic analysis of the histidine kinase family in bacteria and archaea. *Microbiology.* 2001; 147(Pt 5):1197–212. Epub 2001/04/26. <https://doi.org/10.1099/00221287-147-5-1197> PMID: 11320123.
84. Cody WL, Pritchett CL, Jones AK, Carterson AJ, Jackson D, Frisk A, et al. *Pseudomonas aeruginosa* AlgR controls cyanide production in an AlgZ-dependent manner. *J Bacteriol.* 2009; 191(9):2993–3002. Epub 2009/03/10. <https://doi.org/10.1128/JB.01156-08> PMID: 19270096; PubMed Central PMCID: PMC2681793.
85. Lizewski SE, Schurr JR, Jackson DW, Frisk A, Carterson AJ, Schurr MJ. Identification of AlgR-regulated genes in *Pseudomonas aeruginosa* by use of microarray analysis. *J Bacteriol.* 2004; 186(17):5672–84. <https://doi.org/10.1128/JB.186.17.5672-5684.2004> PMID: 15317771
86. Intile PJ, Diaz MR, Urbanowski ML, Wolfgang MC, Yahr TL. The AlgZR two-component system recalibrates the RsmAYZ posttranscriptional regulatory system to inhibit expression of the *Pseudomonas aeruginosa* type III secretion system. *J Bacteriol.* 2014; 196(2):357–66. <https://doi.org/10.1128/JB.01199-13> PMID: 24187093
87. Little AS, Okkotsu Y, Reinhart AA, Damron FH, Barbier M, Barrett B, et al. *Pseudomonas aeruginosa* AlgR phosphorylation status differentially regulates pyocyanin and pyoverdine production. *mBio.* 2018; 9(1). <https://doi.org/10.1128/mBio.02318-17> PMID: 29382736
88. Lee DG, Urbach JM, Wu G, Liberati NT, Feinbaum RL, Miyata S, et al. Genomic analysis reveals that *Pseudomonas aeruginosa* virulence is combinatorial. *Genome Biol.* 2006; 7(10):R90. <https://doi.org/10.1186/gb-2006-7-10-r90> PMID: 17038190
89. Moradali MF, Ghods S, Rehm BHA. *Pseudomonas aeruginosa* lifestyle: a paradigm for adaptation, survival, and persistence. *Front Cell Infect Microbiol.* 2017; 7:39. doi: [10.3389/fcimb.2017.00039](https://doi.org/10.3389/fcimb.2017.00039). PMC5310132. PMID: 28261568
90. Lebeaux D, Chauhan A, Rendueles O, Beloin C. From *in vitro* to *in vivo* models of bacterial biofilm-related infections. *Pathogens.* 2013; 2(2):288–356. doi: [10.3390/pathogens2020288](https://doi.org/10.3390/pathogens2020288). PMC4235718. PMID: 25437038
91. Kus JV, Tullis E, Cvitkovitch DG, Burrows LL. Significant differences in type IV pilin allele distribution among *Pseudomonas aeruginosa* isolates from cystic fibrosis (CF) versus non-CF patients. *Microbiology.* 2004; 150(5):1315–26. <https://doi.org/10.1099/mic.0.26822-0>
92. Pasloske BL, Joffe AM, Sun Q, Volpel K, Paranchych W, Eftekhari F, et al. Serial isolates of *Pseudomonas aeruginosa* from a cystic fibrosis patient have identical pilin sequences. *Infect Immun.* 1988; 56(3):665–72. PMC259343. PMID: 2893774
93. Schurr MJ, Yu H, Martinez-Salazar JM, Hibler NS, Deretic V. Biochemical characterization and post-translational modification of AlgU, a regulator of stress response in *Pseudomonas aeruginosa*. *Biochem Biophys Res Commun.* 1995; 216(3):874–80. Epub 1995/11/22. PMID: 7488207.
94. Martin DW, Schurr MJ, Mudd MH, Govan JR, Holloway BW, Deretic V. Mechanism of conversion to mucoidy in *Pseudomonas aeruginosa* infecting cystic fibrosis patients. *Proc Natl Acad Sci U S A.* 1993; 90(18):8377–81. Epub 1993/09/15. PMID: 8378309; PubMed Central PMCID: PMC215585.
95. Dower WJ, Miller JF, Ragsdale CW. High efficiency transformation of *E. coli* by high voltage electroporation. *Nucleic Acids Res.* 1988; 16(13):6127–45. Epub 1988/07/11. PMID: 3041370; PubMed Central PMCID: PMC215585.
96. Asikyan ML, Kus JV, Burrows LL. Novel proteins that modulate type IV pilus retraction dynamics in *Pseudomonas aeruginosa*. *J Bacteriol.* 2008; 190(21):7022–34. Epub 2008/09/09. <https://doi.org/10.1128/JB.00938-08> PMID: 18776014; PubMed Central PMCID: PMC215585.

97. Ho SN, Hunt HD, Horton RM, Pullen JK, Pease LR. Site-directed mutagenesis by overlap extension using the polymerase chain reaction. *Gene*. 1989; 77(1):51–9. PMID: [2744487](#)
98. Hmelo LR, Borlee BR, Almblad H, Love ME, Randall TE, Tseng BS, et al. Precision-engineering the *Pseudomonas aeruginosa* genome with two-step allelic exchange. *Nat Protoc*. 2015; 10(11):1820–41. Epub 2015/10/23. <https://doi.org/10.1038/nprot.2015.115> PMID: [26492139](#); PubMed Central PMCID: PMC4862005.
99. Gallant CV, Daniels C, Leung JM, Ghosh AS, Young KD, Kotra LP, et al. Common  $\beta$ -lactamases inhibit bacterial biofilm formation. *Molec Microbiol*. 2005; 58(4):1012–24. doi: [10.1111/j.1365-2958.2005.04892.x](#). PMC3097517. PMID: [16262787](#)
100. Wenderska IB, Chong M, McNulty J, Wright GD, Burrows LL. Palmitoyl-DL-carnitine is a multitarget inhibitor of *Pseudomonas aeruginosa* biofilm development. *ChemBioChem*. 2011; 12(18):2759–66. Epub 2011/11/03. <https://doi.org/10.1002/cbic.201100500> PMID: [22045628](#).
101. Tan MW, Mahajan-Miklos S, Ausubel FM. Killing of *Caenorhabditis elegans* by *Pseudomonas aeruginosa* used to model mammalian bacterial pathogenesis. *Proc Natl Acad Sci U S A*. 1999; 96(2):715–20. Epub 1999/01/20. PMID: [9892699](#); PubMed Central PMCID: PMC4862002.
102. Benjamini Y, Hochberg Y. Controlling the false discovery rate: a practical and powerful approach to multiple testing. *J R Stat Soc Series B Stat Methodol*. 1995; 57(1):289–300.
103. Buensuceso RNC, Nguyen Y, Zhang K, Daniel-Ivad M, Sugiman-Marangos SN, Fleetwood AD, et al. The conserved tetratricopeptide repeat-containing C-terminal domain of *Pseudomonas aeruginosa* FimV is required for its cyclic AMP-dependent and -independent functions. *J Bacteriol*. 2016; 198(16):2263–74. doi: [10.1128/JB.00322-16](#). PMC4966435. PMID: [27297880](#)
104. Nguyen Y, Harvey H, Sugiman-Marangos S, Bell SD, Buensuceso RNC, Junop MS, et al. Structural and functional studies of the *Pseudomonas aeruginosa* minor pilin, PilE. *J Biol Chem*. 2015; 290(44):26856–65. <https://doi.org/10.1074/jbc.M115.683334> PMID: [26359492](#)
